# Supplementary material for: On the mechanism of acceptorless dehydrogenation of N-heterocycles catalyzed by tBuOK: a computational study
Source: Royal Society of Chemistry journal article supplement (doi:10.1039/d3ra04305c), 2023-01-01
Supplement: d3ra04305c1.pdf [file d3ra04305c1.pdf]

## Supporting Information

### On the Mechanism of Acceptorless Dehydrogenation of the 1,2,3,4-Tetrahydroquinoline catalyzed by <sup>t</sup>BuOK: A Computational Study

Lishuang Ma,<sup>a</sup> Wenxu Feng,<sup>a</sup> Shidong Zhao,<sup>a</sup> Chuangye Wang,<sup>a</sup> Yanyan Xi,<sup>b</sup> Xufeng Lin,<sup>\*,a,b</sup>

<sup>a</sup> Department of Chemistry, College of Science, China University of Petroleum (East China), Qingdao, 266580, P. R. China

<sup>b</sup> State Key Laboratory of Heavy Oil Processing China University of Petroleum (East China), Qingdao, 266580, P. R. China

\*Corresponding author: hatrick2009@upc.edu.cn

### Contents

|                                                                                                                  |     |
|------------------------------------------------------------------------------------------------------------------|-----|
| 1. Supplementary data for the dehydrogenation of <b>THQ</b> catalyzed by <sup>t</sup> BuOK .....                 | S2  |
| 2. Mechanism details for the tautomerization between <b>34DHQ</b> and <b>14DHQ</b> .....                         | S3  |
| 3. Relative free energy profiles for the dehydrogenation of THQ catalyzed by <sup>t</sup> BuO <sup>-</sup> ..... | S4  |
| 4. Supplementary data for the H <sub>2</sub> elimination process catalyzed by <sup>t</sup> BuOLi.....            | S5  |
| 5. ETS-NOCV analysis.....                                                                                        | S6  |
| 6. Tables for the absolute energies of all the structures involved in this study .....                           | S7  |
| 7. Cartesian coordinates of all the optimized structures .....                                                   | S10 |

## 1. Supplementary data for the dehydrogenation of THQ catalyzed by <sup>t</sup>BuOK

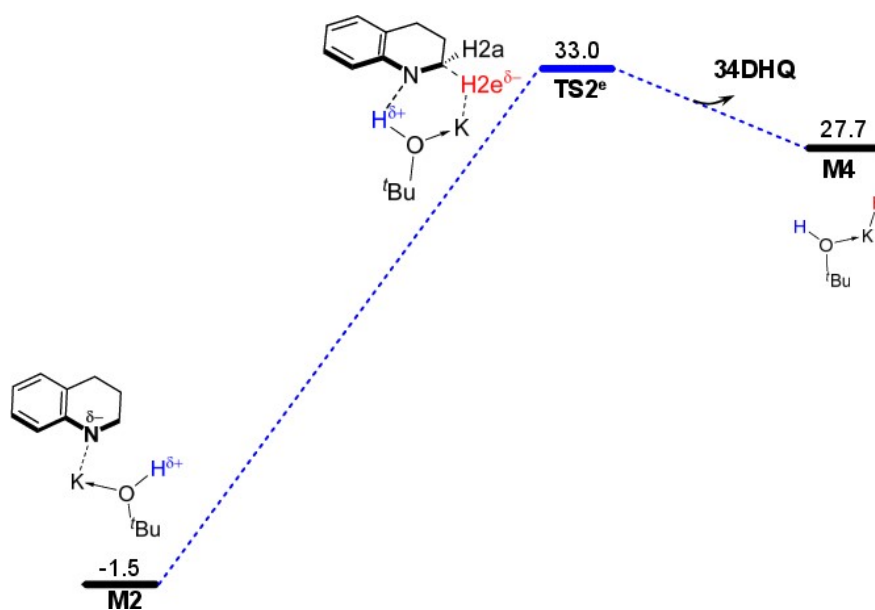

**Figure S1.** Relative free energy profile for the hydride transfer pathway from the equatorial of C2(sp<sup>3</sup>)-H2e bond catalyzed by <sup>t</sup>BuOK in *o*-xylene. The energies are given with respect to the intermediate separated <sup>t</sup>BuOK and THQ as shown in Fig. 1 of the main article.

## 2. Mechanism details for the tautomerization between 34DHQ and 14DHQ.

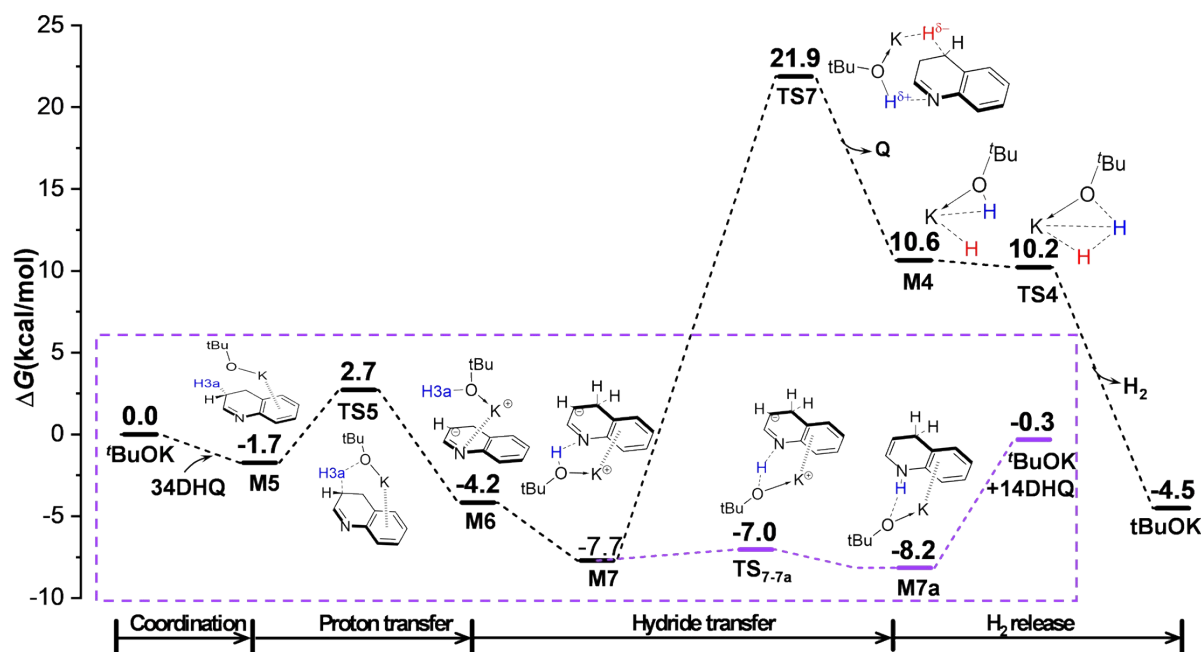

**Figure S2.** Mechanism details for the tautomerization between 34DHQ and 14DHQ via a reversible proton transfer pathway (in square brackets). Energies are in kcal/mol.

### 3. Relative free energy profiles for the dehydrogenation of THQ catalyzed by $t\text{BuO}^-$ .

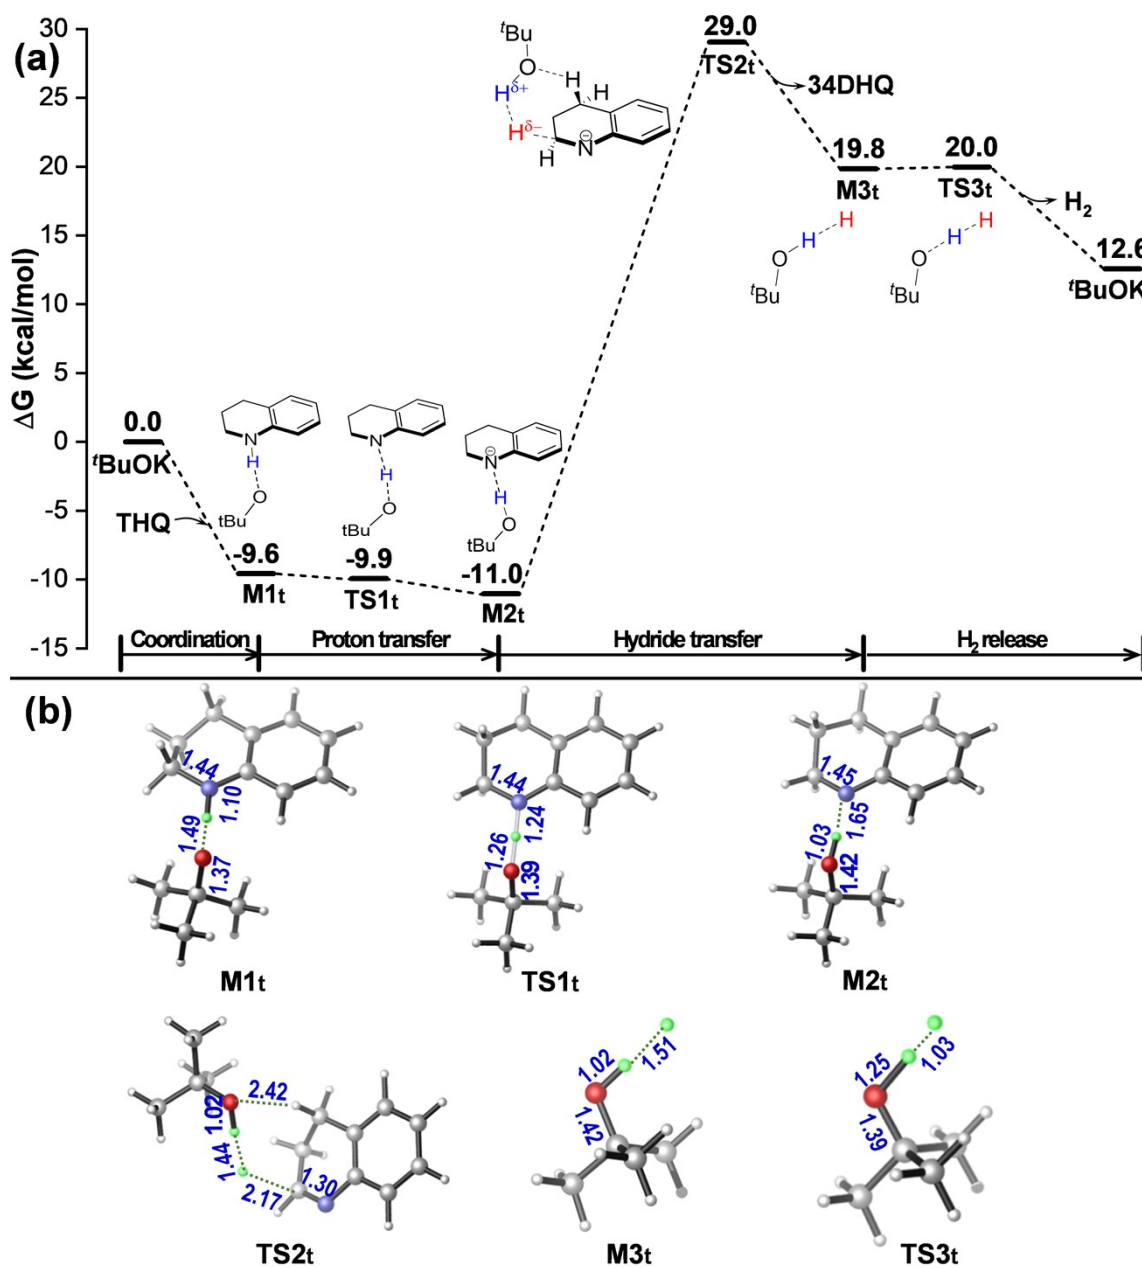

**Figure S3.** (a) Relative free energy profiles for the dehydrogenation reaction of THQ catalyzed by a  $t\text{BuO}^-$  anion in *o*-xylene. (b) Geometrical information. Energies are in kcal/mol, bond distances are in angstroms.

#### 4. Supplementary data for the H<sub>2</sub> elimination process catalyzed by <sup>t</sup>BuOLi

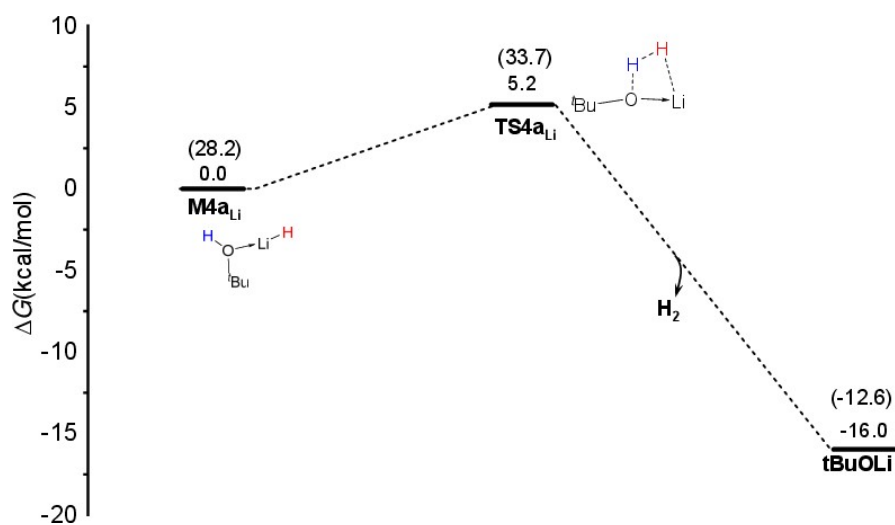

**Figure S4.** Relative free energy profile for the hydrogen release process from the isolated dihydride species LiO<sup>t</sup>Bu(H)(H) in *o*-xylene. Shown in parentheses are the free energies plus the **34DHQ** with respect to the separated <sup>t</sup>BuOLi and **THQ** as shown in Fig. 4 of the main article.

## 5. ETS-NOCV analysis

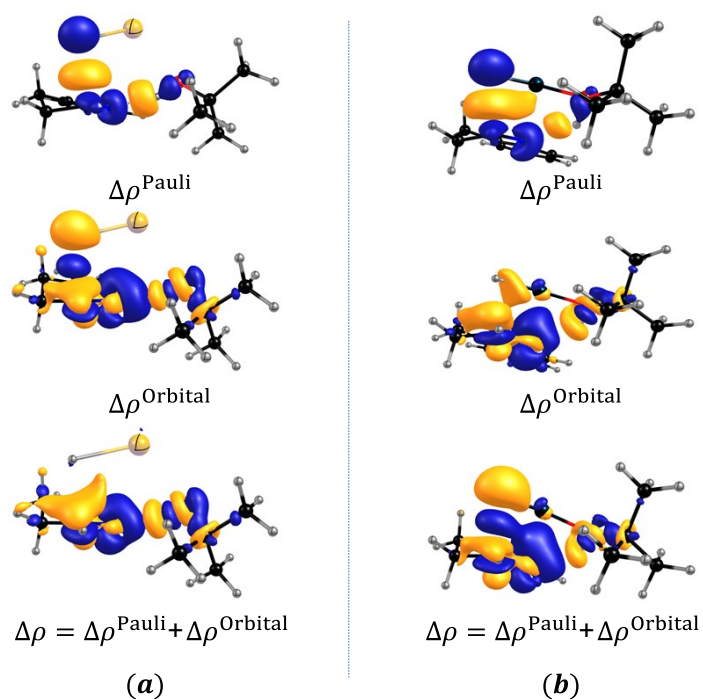

**Figure S5.** ETS-NOCV analysis on the transition states of hydride transfer along the first dehydrogenation of THQ catalyzed by **<sup>t</sup>BuOK (a)** and **<sup>t</sup>BuOLi (b)**. The blue/yellow contours correspond to regions the increased/lowered of election density (i.e., acceptor/donor moieties), the isosurface value was set as 0.002 au.

## 6. Tables for the absolute energies of all the structures involved in this study.

**Table S1.** The absolute electronic energies ( $E+ZPE$ , Hartree), the thermal enthalpies ( $H$ , Hartree) and free energies ( $G$ , Hartree) with zero-point correction at 298.15 K in *o*-xylene, as well as the imaginary frequencies ( $I.F.$ ,  $\text{cm}^{-1}$ ), obtained at B3LYP-D3/def2-TZVP level of theory.

| Species            | $E+ZPE$      | $H$          | $G$          | $I.F.$     |
|--------------------|--------------|--------------|--------------|------------|
| Hydrogen           | -1.169055    | -1.165750    | -1.180547    |            |
| THQ                | -404.335787  | -404.327022  | -404.368081  |            |
| <sup>t</sup> BuOK  | -833.029703  | -833.020562  | -833.063045  |            |
| <sup>t</sup> BuOLi | -240.631901  | -240.623233  | -240.662985  |            |
| 34DHQ              | -403.135700  | -403.127472  | -403.167502  |            |
| 14DHQ              | -403.135817  | -403.127292  | -403.168010  |            |
| 12DHQ              | -403.131831  | -403.123424  | -403.163771  |            |
| Q                  | -401.963029  | -401.955444  | -401.994141  |            |
| THNap              | -388.276977  | -388.268076  | -388.309880  |            |
| DHNap              | -387.248205  | -387.070106  | -387.110404  |            |
| M1                 | -1237.384933 | -1237.371143 | -1237.437724 |            |
| TS1                | -1237.370021 | -1237.369077 | -1237.434839 | -787.0016  |
| M2                 | -1237.689355 | -1237.366174 | -1237.433498 |            |
| TS2                | -1237.335016 | -1237.316107 | -1237.383093 | -379.8821  |
| TS2 <sup>a</sup>   | -1237.330910 | -1237.312163 | -1237.378510 | -482.7764  |
| M3                 | -1237.378639 | -1237.359696 | -1237.426314 |            |
| TS3                | -1237.333984 | -1237.315313 | -1237.381950 | -502.1387  |
| M4                 | -834.184965  | -834.174728  | -834.219455  |            |
| TS4                | -834.186272  | -834.176375  | -834.220126  | -1064.6668 |
| M5                 | -1236.184890 | -1236.166400 | -1236.233312 |            |
| TS5                | -1236.178663 | -1236.160755 | -1236.226213 | -1291.3443 |
| M6                 | -1236.190397 | -1236.172003 | -1236.237193 |            |
| TS6                | -1236.147202 | -1236.129127 | -1236.193922 | -660.5151  |

|                          |              |              |              |            |
|--------------------------|--------------|--------------|--------------|------------|
| <b>M7</b>                | -1236.194362 | -1236.175911 | -1236.242839 |            |
| <b>TS7-7a</b>            | -1236.194688 | -1236.176683 | -1236.241772 | -965.6717  |
| <b>M7a</b>               | -1236.194169 | -1236.175607 | -1236.243557 |            |
| <b>TS7</b>               | -1236.148816 | -1236.130603 | -1236.195684 | -748.7849  |
| <b>M8</b>                | -1236.177580 | -1236.157489 | -1236.227281 |            |
| <b>M9</b>                | -1236.188421 | -1236.170132 | -1236.235797 |            |
| <b>TS8</b>               | -1236.187747 | -1236.169699 | -1236.234602 | -934.4584  |
| <b>M10</b>               | -1236.186099 | -1236.167582 | -1236.234484 |            |
| <b>TS9</b>               | -1236.151231 | -1236.133030 | -1236.198476 | -657.7448  |
| <b>M11</b>               | -1236.179953 | -1236.161322 | -1236.227169 |            |
| <b>TS10</b>              | -1236.149166 | -1236.130952 | -1236.197038 | -829.9286  |
| <b>M1<sub>Nap</sub></b>  | -1221.325936 | -1221.306767 | -1221.375542 |            |
| <b>TS1<sub>Nap</sub></b> | -1221.304171 | -1221.285615 | -1221.351379 | -1232.5244 |
| <b>M2<sub>Nap</sub></b>  | -1221.303705 | -1221.284714 | -1221.351171 |            |
| <b>TS2<sub>Nap</sub></b> | -1221.258555 | -1221.239420 | -1221.305998 | -729.5667  |
| <b>TS3<sub>Nap</sub></b> | -1221.259113 | -1221.240367 | -1221.306730 | -795.4914  |
| <b>M3<sub>Nap</sub></b>  | -1221.293098 | -1221.273098 | -1221.341844 |            |
| <b>M1<sub>t</sub></b>    | -637.472814  | -637.456185  | -637.516979  |            |
| <b>TS1<sub>t</sub></b>   | -637.474763  | -637.458594  | -637.517558  | -1028.3583 |
| <b>M2<sub>t</sub></b>    | -637.475145  | -637.458484  | -637.519313  |            |
| <b>TS2<sub>t</sub></b>   | -637.412550  | -637.396280  | -637.455439  | -320.5911  |
| <b>M3<sub>t</sub></b>    | -234.273122  | -234.264844  | -234.302616  |            |
| <b>TS3<sub>t</sub></b>   | -234.273148  | -234.265154  | -234.302396  | -1187.7696 |
| <b>M1<sub>Li</sub></b>   | -644.989456  | -644.971254  | -645.037689  |            |
| <b>TS1<sub>Li</sub></b>  | -644.977997  | -644.960525  | -645.024128  | -867.2042  |
| <b>M2<sub>Li</sub></b>   | -644.976443  | -644.958630  | -645.021878  |            |
| <b>TS2<sub>Li</sub></b>  | -644.932521  | -644.914648  | -644.978361  | -501.0166  |
| <b>M3<sub>Li</sub></b>   | -644.969201  | -644.951617  | -645.013580  |            |
| <b>TS3<sub>Li</sub></b>  | -644.918209  | -644.900625  | -644.962946  | -1159.7698 |
| <b>M4<sub>Li</sub></b>   | -644.944190  | -644.925468  | -644.991341  |            |



|                          |             |             |             |            |
|--------------------------|-------------|-------------|-------------|------------|
| <b>TS4<sub>Li</sub></b>  | -644.944202 | -644.925843 | -644.990623 | -1122.7034 |
| <b>M4a<sub>Li</sub></b>  | -241.785448 | -241.775037 | -241.818062 |            |
| <b>TS4a<sub>Li</sub></b> | -241.777776 | -241.768242 | -241.809829 | -1165.0216 |
| <b>M5<sub>Li</sub></b>   | -644.952005 | -644.931553 | -645.001542 |            |

**Table S2.** The absolute electronic energies ( $E_{\text{BS-2}}$ , Hartree) calculated at B3LYP-D3/def2-QZVP level of theory, the thermal correction to Gibbs free energy ( $G_{\text{corr}}$ , Hartree) obtained at B3LYP/def2-TZVP level of theory, as well as the refined single-point free energies ( $G_{\text{BS-2}}$ , Hartree) for the critical rate-determining intermediates and transition states at 298.15 K in *o*-xylene.

| <b>Species</b>          | $E_{\text{BS-2}}$ | $G_{\text{corr}}$ | $G_{\text{BS-2}}$ |
|-------------------------|-------------------|-------------------|-------------------|
| <b>M1</b>               | -1237.757317      | 0.258030          | -1237.499287      |
| <b>TS2</b>              | -1237.694692      | 0.250361          | -1237.444331      |
| <b>TS3</b>              | -1237.693205      | 0.249960          | -1237.443245      |
| <b>M1<sub>Li</sub></b>  | -645.349019       | 0.260231          | -645.088788       |
| <b>TS2<sub>Li</sub></b> | -645.282282       | 0.255275          | -645.027007       |
| <b>TS3<sub>Li</sub></b> | -645.264138       | 0.253232          | -645.010906       |

**7. Cartesian coordinates of all the optimized structures (obtained at the B3LYP-D3/def2-TZVP level of theory).**

|                         |             |             |             |                          |             |             |             |
|-------------------------|-------------|-------------|-------------|--------------------------|-------------|-------------|-------------|
| <b>Hydrogen</b>         |             |             |             | H                        | 2.72126000  | 0.70753700  | -1.32536700 |
| H                       | 0.00000000  | 0.00000000  | 0.37232900  | H                        | 1.25524800  | 0.15897800  | -2.16138300 |
| H                       | 0.00000000  | 0.00000000  | -0.37232900 | H                        | 1.26169800  | 1.71669300  | -1.32629700 |
| <b>THQ</b>              |             |             |             | <b><sup>t</sup>BuOLi</b> |             |             |             |
| C                       | 1.33960100  | -1.37896200 | -0.05485600 | Li                       | -1.93510300 | -0.00400200 | 0.00380100  |
| C                       | 0.11467700  | -0.69496500 | -0.01766900 | O                        | -0.32608500 | -0.00267000 | 0.00081600  |
| C                       | 0.11607900  | 0.71299300  | 0.04300500  | C                        | 1.05372400  | -0.00014800 | -0.00053600 |
| C                       | 1.33735000  | 1.38135800  | 0.04901300  | C                        | 1.57590800  | 0.76582000  | 1.22996900  |
| C                       | 2.55009500  | 0.70280800  | 0.01163800  | C                        | 1.57812400  | -1.44798300 | 0.04649900  |
| C                       | 2.54097600  | -0.68865700 | -0.03903900 | C                        | 1.57409500  | 0.68502000  | -1.27880500 |
| H                       | 1.33564700  | -2.46264600 | -0.10403100 | H                        | 1.20782500  | 1.79476900  | 1.20760300  |
| H                       | 1.33166400  | 2.46582300  | 0.08638000  | H                        | 1.20347500  | 0.29436800  | 2.14296800  |
| H                       | 3.48471500  | 1.24867900  | 0.01898100  | H                        | 2.66887900  | 0.79144800  | 1.27628600  |
| H                       | 3.47325600  | -1.23980200 | -0.06860100 | H                        | 1.20626700  | -2.00285100 | -0.81863200 |
| C                       | -1.19037500 | 1.47461900  | 0.11339500  | H                        | 2.67117900  | -1.50018400 | 0.04616000  |
| C                       | -2.37504500 | 0.63288100  | -0.36434900 | H                        | 1.20975600  | -1.94397600 | 0.94804600  |
| C                       | -2.32512200 | -0.74806700 | 0.27828300  | H                        | 2.66704300  | 0.71140300  | -1.32618000 |
| N                       | -1.07825500 | -1.40124300 | -0.08810000 | H                        | 1.20389100  | 0.15433700  | -2.15962200 |
| H                       | -1.11502400 | 2.39248600  | -0.47480500 | H                        | 1.20291400  | 1.71204500  | -1.32355100 |
| H                       | -2.33806100 | 0.51626200  | -1.45107300 | <b>34DHQ</b>             |             |             |             |
| H                       | -3.15219200 | -1.36866900 | -0.07104000 | C                        | 0.49069600  | -1.62604900 | 2.82696400  |
| H                       | -1.01050900 | -2.37486700 | 0.16417000  | C                        | 0.18635300  | -0.48931100 | 2.07855500  |
| H                       | -1.36872500 | 1.78863000  | 1.14810600  | C                        | -1.14258300 | -0.23317800 | 1.69930500  |
| H                       | -3.31797500 | 1.12458900  | -0.11751100 | C                        | -2.13673600 | -1.12555800 | 2.08141600  |
| H                       | -2.42442300 | -0.64584000 | 1.36960600  | C                        | -1.83114000 | -2.25534000 | 2.83589200  |
| <b><sup>t</sup>BuOK</b> |             |             |             | C                        | -0.51492900 | -2.50395000 | 3.21095600  |
| K                       | -2.58235800 | -0.04726800 | 0.00843900  | H                        | 1.52316300  | -1.80285400 | 3.10128500  |
| O                       | -0.28822500 | 0.01209600  | -0.00084000 | H                        | -3.16312800 | -0.93258300 | 1.78959100  |
| C                       | 1.08554100  | 0.00609900  | -0.00123700 | H                        | -2.61917200 | -2.93770900 | 3.12939500  |
| C                       | 1.62746600  | 0.76803600  | 1.22933000  | H                        | -0.27209200 | -3.38145000 | 3.79708100  |
| C                       | 1.61620500  | -1.44479400 | 0.04648200  | C                        | -1.41363300 | 0.98807600  | 0.85962000  |
| C                       | 1.62679200  | 0.68708100  | -1.27888700 | C                        | -0.42167800 | 2.09827100  | 1.20624000  |
| H                       | 1.26605100  | 1.79987400  | 1.20923600  | C                        | 0.97255700  | 1.54066700  | 1.30563500  |
| H                       | 1.25254300  | 0.29905400  | 2.14328400  | N                        | 1.25176100  | 0.36375200  | 1.70635900  |
| H                       | 2.72192400  | 0.78677800  | 1.27615600  | H                        | -2.44142300 | 1.32854200  | 0.99252900  |
| H                       | 1.24273000  | -1.99891400 | -0.81913000 | H                        | -0.67311100 | 2.54350000  | 2.17830300  |
| H                       | 2.71025900  | -1.50382600 | 0.04721600  | H                        | -1.30237700 | 0.72321300  | -0.19902500 |
| H                       | 1.24475900  | -1.94002600 | 0.94781800  | H                        | -0.45325200 | 2.90666000  | 0.47428600  |

|              |             |             |            |
|--------------|-------------|-------------|------------|
| H            | 1.80838000  | 2.18723700  | 1.04128500 |
| <b>14DHQ</b> |             |             |            |
| C            | -6.37946400 | -3.60435600 | 3.40303900 |
| C            | -5.18689600 | -2.90864600 | 3.62610000 |
| C            | -5.19433400 | -1.72254300 | 4.37939600 |
| C            | -6.41111000 | -1.26266000 | 4.87375300 |
| C            | -7.59961800 | -1.95134200 | 4.65647400 |
| C            | -7.57630000 | -3.13108400 | 3.91900500 |
| H            | -6.35862200 | -4.51804200 | 2.81912500 |
| H            | -6.42287700 | -0.34309200 | 5.44881400 |
| H            | -8.53071900 | -1.57307600 | 5.05844100 |
| H            | -8.49144400 | -3.68161300 | 3.73896900 |
| C            | -3.90279000 | -0.97913500 | 4.66797100 |
| C            | -2.78513500 | -1.43001900 | 3.76669900 |
| C            | -2.86631100 | -2.56452800 | 3.06908000 |
| N            | -3.98848500 | -3.38173900 | 3.09707600 |
| H            | -4.04751000 | -4.11856500 | 2.41433100 |
| H            | -1.88188400 | -0.83789200 | 3.71168700 |
| H            | -4.06968400 | 0.09808900  | 4.56374500 |
| H            | -2.05907900 | -2.92045100 | 2.44277300 |
| H            | -3.62202000 | -1.12677400 | 5.72101500 |

**12DHQ**

|   |             |             |            |
|---|-------------|-------------|------------|
| C | -6.37682000 | -3.60938200 | 3.41331400 |
| C | -5.17591600 | -2.92394100 | 3.61881100 |
| C | -5.18640200 | -1.72090600 | 4.36279600 |
| C | -6.39318400 | -1.24612100 | 4.87278200 |
| C | -7.58645100 | -1.92791100 | 4.66021400 |
| C | -7.56747900 | -3.11363800 | 3.93141300 |
| H | -6.37113000 | -4.53573900 | 2.84950600 |
| H | -6.38813100 | -0.32630200 | 5.44698500 |
| H | -8.51543800 | -1.54410900 | 5.06116600 |
| H | -8.48771800 | -3.65864600 | 3.75887000 |
| C | -3.91170500 | -1.05178200 | 4.58876100 |
| C | -2.80626600 | -1.42864600 | 3.94228200 |
| C | -2.84181200 | -2.53007900 | 2.92139700 |
| N | -3.96425400 | -3.42648300 | 3.18157600 |
| H | -4.03114800 | -4.20930600 | 2.54931400 |
| H | -1.86340300 | -0.91839000 | 4.09569400 |
| H | -3.88517500 | -0.23104700 | 5.29707400 |
| H | -2.89413400 | -2.08918200 | 1.90940100 |
| H | -1.91963000 | -3.11478000 | 2.95806000 |

**Q**

|   |             |             |             |
|---|-------------|-------------|-------------|
| C | 1.20469400  | -1.40070700 | 0.00000100  |
| C | -0.02714000 | -0.70415600 | -0.00000100 |
| C | -0.01439100 | 0.72279200  | 0.00000100  |
| C | 1.22699800  | 1.40267900  | 0.00000500  |
| C | 2.40399900  | 0.69969200  | 0.00000600  |
| C | 2.39100400  | -0.71293800 | 0.00000400  |
| H | 1.17676900  | -2.48280300 | -0.00000100 |
| H | 1.23067100  | 2.48653400  | 0.00000600  |
| H | 3.35078000  | 1.22504200  | 0.00000900  |
| H | 3.32939900  | -1.25343200 | 0.00000500  |
| C | -1.26156600 | 1.38778500  | 0.00000000  |
| C | -2.41480900 | 0.65068400  | -0.00000400 |
| C | -2.32102200 | -0.75907900 | -0.00000500 |
| N | -1.18667900 | -1.41946200 | -0.00000400 |
| H | -1.28831200 | 2.47135800  | 0.00000100  |
| H | -3.22913000 | -1.35488600 | -0.00000900 |
| H | -3.38795200 | 1.12386100  | -0.00000500 |

**THNap**

|   |             |             |            |
|---|-------------|-------------|------------|
| C | -5.92982600 | -3.35414600 | 2.80038200 |
| C | -4.85946400 | -2.68162300 | 3.38218600 |
| C | -5.09896300 | -1.52759200 | 4.14361100 |
| C | -6.40341900 | -1.07239300 | 4.30985200 |
| C | -7.46921200 | -1.74616900 | 3.71942200 |
| C | -7.23187800 | -2.88901300 | 2.96394400 |
| H | -5.74467800 | -4.24973500 | 2.21755500 |
| H | -6.58759800 | -0.18459000 | 4.90469400 |
| H | -8.48093000 | -1.38325300 | 3.85375500 |
| H | -8.05773200 | -3.42011400 | 2.50648500 |
| C | -3.89894500 | -0.85780400 | 4.75381800 |
| C | -2.99768500 | -1.87906700 | 5.47689300 |
| C | -2.75040700 | -3.16643500 | 4.64605200 |
| C | -3.42946100 | -3.12917700 | 3.26307700 |
| H | -4.20203900 | -0.06548200 | 5.44089600 |
| H | -3.47231300 | -2.14441100 | 6.42378200 |
| H | -3.13751100 | -4.03020300 | 5.19080000 |
| H | -3.36579500 | -4.10692200 | 2.78181000 |
| H | -3.31793200 | -0.37587500 | 3.95854600 |
| H | -2.05001400 | -1.39852000 | 5.72873400 |
| H | -1.67991400 | -3.33699700 | 4.51420100 |
| H | -2.88604400 | -2.42727500 | 2.61940400 |

**DHNap**

|           |             |             |             |            |             |             |             |
|-----------|-------------|-------------|-------------|------------|-------------|-------------|-------------|
| C         | -2.06353200 | 0.39951800  | 0.64972800  | H          | -6.56597100 | -0.42316700 | 5.25724600  |
| C         | -0.84035500 | 0.70055200  | 1.25391400  | H          | -8.58969700 | -0.83735300 | 3.88989900  |
| C         | -0.44621500 | 2.04700600  | 1.38162600  | H          | -8.47966600 | -2.48986800 | 2.03030300  |
| C         | -1.29016100 | 3.04880800  | 0.91900800  | C          | -4.08552400 | -1.53846200 | 5.00421200  |
| C         | -2.51307700 | 2.73946300  | 0.32708400  | C          | -3.22637700 | -2.80477700 | 5.01770600  |
| C         | -2.89814100 | 1.41087600  | 0.18885200  | C          | -2.87710800 | -3.20037800 | 3.58660200  |
| H         | -2.36325800 | -0.63760100 | 0.54968800  | N          | -4.05735400 | -3.28213700 | 2.73378400  |
| H         | -0.98707800 | 4.08540500  | 1.01654700  | H          | -4.37814200 | -1.25609200 | 6.01806200  |
| H         | -3.15887700 | 3.53391200  | -0.02620700 | H          | -3.78091900 | -3.61653000 | 5.49711400  |
| H         | -3.84523300 | 1.16299600  | -0.27427300 | H          | -2.37409200 | -4.16923700 | 3.56404100  |
| C         | 0.92083800  | 2.34161100  | 1.95067300  | H          | -4.12176300 | -4.11656600 | 2.10625800  |
| C         | 1.32761500  | 1.34309400  | 3.03772200  | H          | -3.48822900 | -0.70699400 | 4.60954000  |
| C         | 1.04271600  | -0.07076900 | 2.61109000  | H          | -2.30921000 | -2.64897100 | 5.58964600  |
| C         | 0.03542900  | -0.34920000 | 1.77774900  | H          | -2.16554700 | -2.46409800 | 3.18640500  |
| H         | 0.96532500  | 3.36409600  | 2.33012900  |            |             |             |             |
| H         | 0.77498800  | 1.55026200  | 3.96467800  | <b>TSI</b> |             |             |             |
| H         | 1.64082500  | -0.87051600 | 3.03296800  | K          | 0.76124200  | 0.91661200  | -2.16917800 |
| H         | 1.64821200  | 2.27764800  | 1.13092000  | O          | 0.67467400  | -1.48638000 | -1.47880500 |
| H         | 2.38514200  | 1.46631800  | 3.28044300  | C          | 0.41857000  | -2.87097600 | -1.38686800 |
| H         | -0.19035400 | -1.37522000 | 1.50785600  | C          | 1.32695400  | -3.49548400 | -0.31709700 |
|           |             |             |             | C          | -1.05327500 | -3.10042700 | -1.01152200 |
| <b>M1</b> |             |             |             | C          | 0.71555000  | -3.49406500 | -2.75270400 |
| K         | -3.72671700 | -2.99656200 | -0.25531600 | H          | 2.37435800  | -3.29135600 | -0.55058300 |
| O         | -4.09437100 | -5.12782900 | 0.72511200  | H          | 1.10661000  | -3.06601600 | 0.66264000  |
| C         | -4.27553700 | -6.48845300 | 0.90307300  | H          | 1.19190800  | -4.57830900 | -0.25178600 |
| C         | -3.48304600 | -6.97315900 | 2.13528700  | H          | -1.70764000 | -2.65998800 | -1.76758300 |
| C         | -5.77026100 | -6.79984400 | 1.12091800  | H          | -1.29149500 | -4.16462900 | -0.93148000 |
| C         | -3.78049500 | -7.25260300 | -0.34051900 | H          | -1.27499500 | -2.62694300 | -0.05286700 |
| H         | -2.42185300 | -6.74638400 | 2.00277400  | H          | 0.52803000  | -4.57104100 | -2.75654300 |
| H         | -3.83199600 | -6.45080600 | 3.03014100  | H          | 0.08674100  | -3.03475700 | -3.51958900 |
| H         | -3.58546400 | -8.04906200 | 2.30910100  | H          | 1.76056000  | -3.32576400 | -3.02359500 |
| H         | -6.34689800 | -6.45875200 | 0.25698800  | C          | -1.59992700 | 0.76126400  | -0.18635400 |
| H         | -5.96482100 | -7.86775400 | 1.26453400  | C          | -0.47899700 | 0.83876700  | 0.69004800  |
| H         | -6.13456000 | -6.26436500 | 2.00092100  | C          | -0.50140000 | 1.87756900  | 1.67149800  |
| H         | -3.90419200 | -8.33690200 | -0.25134200 | C          | -1.56136200 | 2.77127600  | 1.70700700  |
| H         | -4.33353500 | -6.91752100 | -1.22250000 | C          | -2.62871900 | 2.70816300  | 0.80940600  |
| H         | -2.72049200 | -7.04123200 | -0.50635200 | C          | -2.63843200 | 1.67896900  | -0.12813800 |
| C         | -6.40970200 | -2.92712900 | 2.33287300  | H          | -1.65597700 | -0.07479100 | -0.87572400 |
| C         | -5.24208900 | -2.66616200 | 3.07846100  | H          | -1.55559500 | 3.54454200  | 2.47017500  |
| C         | -5.31457800 | -1.75293000 | 4.15410100  | H          | -3.43926900 | 3.42335600  | 0.86250600  |
| C         | -6.52097200 | -1.11457400 | 4.42184300  | H          | -3.47350600 | 1.57541100  | -0.81267400 |
| C         | -7.66341400 | -1.34886200 | 3.66192900  | C          | 0.62444700  | 1.94609800  | 2.67921600  |
| C         | -7.59627700 | -2.26951800 | 2.61848500  | C          | 1.29411500  | 0.57974900  | 2.82857200  |
| H         | -6.36781100 | -3.67387200 | 1.54752500  | C          | 1.68138800  | 0.05735000  | 1.44717700  |

|           |             |             |             |                        |             |             |             |
|-----------|-------------|-------------|-------------|------------------------|-------------|-------------|-------------|
| N         | 0.54806000  | -0.03554500 | 0.54431300  | H                      | 2.16916100  | 0.71148000  | 3.59883800  |
| H         | 0.24276500  | 2.30059700  | 3.64060100  | H                      | 2.48481400  | 0.82020300  | 1.17281200  |
| H         | 0.59648200  | -0.12370700 | 3.29371200  |                        |             |             |             |
| H         | 2.13845700  | -0.93342500 | 1.52696600  | <b>TS2</b>             |             |             |             |
| H         | 0.58178400  | -0.92069700 | -0.45895600 | K                      | -3.06456300 | -2.88184400 | 0.69067100  |
| H         | 1.37858300  | 2.67658900  | 2.36050700  | O                      | -4.41302200 | -5.17219300 | 0.87426600  |
| H         | 2.17494300  | 0.64544800  | 3.47219200  | C                      | -4.25467300 | -6.59931600 | 0.83590200  |
| H         | 2.46771400  | 0.71969600  | 1.04122900  | C                      | -3.18294700 | -7.01990800 | 1.84399200  |
|           |             |             |             | C                      | -5.59560100 | -7.25811600 | 1.16598800  |
| <b>M2</b> |             |             |             | C                      | -3.81953200 | -6.93220700 | -0.58648300 |
| K         | 0.79188500  | 0.96460100  | -1.99915000 | H                      | -2.24141100 | -6.50719200 | 1.63700800  |
| O         | 0.74458100  | -1.55128900 | -1.43099700 | H                      | -3.49179500 | -6.76898300 | 2.86101700  |
| C         | 0.43674000  | -2.93944000 | -1.32038500 | H                      | -3.00414000 | -8.09662600 | 1.80265700  |
| C         | 1.34270300  | -3.57562500 | -0.26097200 | H                      | -6.36025100 | -6.93376800 | 0.45762500  |
| C         | -1.03523200 | -3.10605300 | -0.92657600 | H                      | -5.52458900 | -8.34750300 | 1.12510400  |
| C         | 0.69878900  | -3.55706300 | -2.69078700 | H                      | -5.91988700 | -6.97653600 | 2.17044500  |
| H         | 2.39230600  | -3.42252000 | -0.52041700 | H                      | -3.69912500 | -8.00908400 | -0.71737600 |
| H         | 1.16235200  | -3.11932800 | 0.71472800  | H                      | -4.56290600 | -6.57919400 | -1.30402300 |
| H         | 1.16054900  | -4.64936800 | -0.17360900 | H                      | -2.86472100 | -6.45311900 | -0.81557500 |
| H         | -1.68259500 | -2.64497000 | -1.67571300 | C                      | -6.72902200 | -2.96122400 | 2.66363600  |
| H         | -1.30744100 | -4.16110200 | -0.84208300 | C                      | -5.52477000 | -2.78908400 | 3.35436100  |
| H         | -1.22811800 | -2.62450100 | 0.03392400  | C                      | -5.30807000 | -1.60654500 | 4.08912600  |
| H         | 0.48402000  | -4.62790700 | -2.68950900 | C                      | -6.30571700 | -0.63922500 | 4.11448200  |
| H         | 0.06938900  | -3.08318300 | -3.44773700 | C                      | -7.50593700 | -0.81669200 | 3.42962000  |
| H         | 1.74320300  | -3.41551100 | -2.97710600 | C                      | -7.71610500 | -1.98434000 | 2.70404900  |
| C         | -1.57123600 | 0.80311900  | -0.09015200 | H                      | -6.87824600 | -3.87493400 | 2.10128400  |
| C         | -0.45004400 | 0.88767300  | 0.79238300  | H                      | -6.14102700 | 0.26899300  | 4.68448400  |
| C         | -0.50467400 | 1.92280500  | 1.78379700  | H                      | -8.27016700 | -0.05038600 | 3.46707700  |
| C         | -1.57712100 | 2.79975400  | 1.81543000  | H                      | -8.64613400 | -2.13547600 | 2.16980300  |
| C         | -2.63776500 | 2.72905600  | 0.90818300  | C                      | -3.99135400 | -1.42619800 | 4.80877200  |
| C         | -2.62411500 | 1.70441000  | -0.03451400 | C                      | -3.35692900 | -2.77719300 | 5.13102200  |
| H         | -1.61746600 | -0.03400600 | -0.78035200 | C                      | -3.48348500 | -3.72544500 | 3.97687700  |
| H         | -1.58933000 | 3.56752000  | 2.58458000  | N                      | -4.55001500 | -3.79916900 | 3.24230900  |
| H         | -3.45908000 | 3.43196500  | 0.95970800  | H                      | -4.13915400 | -0.84398100 | 5.72071600  |
| H         | -3.45347800 | 1.59089000  | -0.72484800 | H                      | -3.88620800 | -3.24290600 | 5.97564500  |
| C         | 0.60986300  | 2.00113500  | 2.80306100  | H                      | -2.77340300 | -4.53817900 | 3.89774100  |
| C         | 1.29569800  | 0.64260100  | 2.94488400  | H                      | -4.57527600 | -4.86596000 | 1.80809300  |
| C         | 1.70136700  | 0.14117600  | 1.55976100  | H                      | -3.30463300 | -0.86164600 | 4.17236700  |
| N         | 0.58682400  | 0.03496300  | 0.63219300  | H                      | -2.31199500 | -2.66967800 | 5.41374700  |
| H         | 0.21493700  | 2.34315200  | 3.76394600  | H                      | -1.82455600 | -2.70728600 | 2.78892200  |
| H         | 0.60196100  | -0.07459700 | 3.39519300  |                        |             |             |             |
| H         | 2.17852300  | -0.84145200 | 1.63906700  | <b>TS2<sup>a</sup></b> |             |             |             |
| H         | 0.64367100  | -1.06548400 | -0.51547600 | K                      | 1.17479600  | 0.64302100  | 2.67764900  |
| H         | 1.35780000  | 2.74379500  | 2.49732100  | O                      | 2.23741600  | -0.02113200 | 0.36348500  |

|           |             |             |             |            |             |             |             |
|-----------|-------------|-------------|-------------|------------|-------------|-------------|-------------|
| C         | 3.22996900  | -0.04993500 | -0.67193900 | H          | -2.85606000 | -0.09426900 | -3.61956000 |
| C         | 3.42625200  | 1.36506600  | -1.22131700 | H          | 0.93138400  | 0.08671000  | -3.93076400 |
| C         | 4.50849400  | -0.55889400 | -0.01636800 | H          | -0.55216600 | -0.02264500 | -4.88669500 |
| C         | 2.76959300  | -0.99762800 | -1.78180300 | H          | -0.02830000 | -1.40663500 | -3.92151700 |
| H         | 2.49934800  | 1.73324000  | -1.66685100 | H          | -1.44631800 | 2.10394100  | -3.65025000 |
| H         | 3.71431900  | 2.04768900  | -0.41936800 | H          | 0.07217300  | 2.15023000  | -2.73815800 |
| H         | 4.20282200  | 1.38545200  | -1.98924700 | H          | -1.47767200 | 2.09828500  | -1.88430800 |
| H         | 4.34957700  | -1.55233900 | 0.40811500  | H          | -0.59816800 | 0.09332400  | -0.78681200 |
| H         | 5.32180100  | -0.62168800 | -0.74163700 | H          | 2.49929400  | 1.35096200  | 0.35963100  |
| H         | 4.81836800  | 0.11286200  | 0.78740800  | C          | -0.31819800 | -1.53459900 | 1.71164900  |
| H         | 3.50803900  | -1.05292000 | -2.58469000 | C          | 0.32509000  | -0.26077200 | 1.55549100  |
| H         | 2.61516800  | -2.00265200 | -1.38471400 | C          | -0.56546600 | 0.85722000  | 1.34566800  |
| H         | 1.82625100  | -0.65228400 | -2.21049100 | C          | -1.93596800 | 0.65745400  | 1.26000500  |
| C         | -1.01432900 | -1.40933500 | 0.05633600  | C          | -2.52517500 | -0.60645300 | 1.35787700  |
| C         | -1.30596100 | -0.05884300 | -0.16769300 | C          | -1.68810000 | -1.69639300 | 1.60037400  |
| C         | -2.61752500 | 0.31649500  | -0.52290900 | H          | 0.30676400  | -2.38535300 | 1.97148000  |
| C         | -3.59759000 | -0.66066100 | -0.63388300 | H          | -2.57082200 | 1.52650100  | 1.10585600  |
| C         | -3.30523300 | -2.00299100 | -0.39790100 | H          | -3.59717600 | -0.72799400 | 1.27684500  |
| C         | -2.00925500 | -2.37372500 | -0.05422500 | H          | -2.11454900 | -2.68670600 | 1.72232600  |
| H         | 0.00409200  | -1.69349100 | 0.29451000  | C          | 0.03997600  | 2.23847200  | 1.24775300  |
| H         | -4.60541200 | -0.36876500 | -0.90888800 | C          | 1.39663400  | 2.26706100  | 1.95011000  |
| H         | -4.08261100 | -2.75153000 | -0.48690000 | C          | 2.26210500  | 1.12321400  | 1.41798800  |
| H         | -1.77029300 | -3.41553000 | 0.12241900  | N          | 1.66313200  | -0.19680100 | 1.54967900  |
| C         | -2.85489400 | 1.77688900  | -0.79741100 | H          | -0.64128900 | 2.98032300  | 1.67467900  |
| C         | -2.02063900 | 2.61877200  | 0.17222700  | H          | 1.25513000  | 2.13618300  | 3.02768500  |
| C         | -0.58440100 | 2.13464500  | 0.15750400  | H          | 0.18304000  | 2.52077300  | 0.19671000  |
| N         | -0.27775900 | 0.88928600  | -0.09130000 | H          | 1.89614800  | 3.22834900  | 1.79877900  |
| H         | -3.91455600 | 2.02280100  | -0.71025400 | H          | 3.22727700  | 1.11931800  | 1.93708800  |
| H         | -2.42542500 | 2.51742300  | 1.17793900  |            |             |             |             |
| H         | -0.17771700 | 2.61747800  | 2.17543700  | <b>TS3</b> |             |             |             |
| H         | 1.36538000  | 0.31434100  | 0.00205500  | K          | -0.42369600 | -0.90611200 | -2.83845900 |
| H         | -2.55868100 | 1.99971400  | -1.83040300 | O          | -2.08875200 | 0.30570700  | -4.40854500 |
| H         | -2.05055300 | 3.67998200  | -0.08066000 | C          | -2.83357300 | 0.76074900  | -5.54417000 |
| H         | 0.20724300  | 2.86046100  | 0.04658500  | C          | -3.94619600 | 1.70353500  | -5.07968700 |
|           |             |             |             | C          | -3.42337500 | -0.49253400 | -6.18297500 |
| <b>M3</b> |             |             |             | C          | -1.89325900 | 1.47573600  | -6.51806100 |
| K         | 1.72453600  | -1.79215200 | -0.59114700 | H          | -3.52332700 | 2.58685600  | -4.59642400 |
| O         | -0.16084700 | -0.24145400 | -1.59079600 | H          | -4.59496800 | 1.19683900  | -4.36297600 |
| C         | -0.88310700 | 0.20535600  | -2.75830200 | H          | -4.55648300 | 2.03700000  | -5.92234000 |
| C         | -2.28905900 | -0.39205900 | -2.73494300 | H          | -2.62661600 | -1.17574500 | -6.48541000 |
| C         | -0.08391600 | -0.31572200 | -3.94586700 | H          | -4.01400800 | -0.24299100 | -7.06685300 |
| C         | -0.93589000 | 1.73262900  | -2.75931200 | H          | -4.06917700 | -1.01210300 | -5.47240200 |
| H         | -2.83317800 | -0.05702100 | -1.84966000 | H          | -2.42927300 | 1.81194300  | -7.40892600 |
| H         | -2.23836700 | -1.48198600 | -2.70543400 | H          | -1.09097200 | 0.80469400  | -6.83225300 |

|            |             |             |             |           |             |             |             |
|------------|-------------|-------------|-------------|-----------|-------------|-------------|-------------|
| H          | -1.43969900 | 2.34710300  | -6.04147200 | O         | 0.51629300  | 0.43918900  | -1.96422800 |
| H          | -1.64836000 | 1.07579900  | -3.91341300 | C         | -0.38653000 | 0.69300000  | -3.01944500 |
| H          | -0.79572600 | 1.75665700  | -2.91510500 | C         | -0.84941900 | 2.15672000  | -2.96676900 |
| C          | -2.10911100 | -1.47598300 | 0.33476200  | C         | -1.58760700 | -0.23941000 | -2.83827700 |
| C          | -2.10580400 | -0.18424300 | -0.21126100 | C         | 0.29825900  | 0.40842900  | -4.36470500 |
| C          | -3.34027300 | 0.43524500  | -0.50451300 | H         | 0.00339300  | 2.82826500  | -3.08224900 |
| C          | -4.52079100 | -0.25038900 | -0.24831400 | H         | -1.31538000 | 2.36658800  | -2.00120500 |
| C          | -4.51474200 | -1.53521400 | 0.29128000  | H         | -1.57266500 | 2.38081400  | -3.75578700 |
| C          | -3.30058900 | -2.14626000 | 0.58427200  | H         | -1.26092700 | -1.28203600 | -2.85634600 |
| H          | -1.15602000 | -1.93307100 | 0.57685200  | H         | -2.33117900 | -0.09956700 | -3.62813800 |
| H          | -5.46583100 | 0.23272700  | -0.47389900 | H         | -2.06960800 | -0.05022800 | -1.87606100 |
| H          | -5.44820200 | -2.04922300 | 0.48359200  | H         | -0.37717200 | 0.57542900  | -5.20846300 |
| H          | -3.27987800 | -3.14135200 | 1.01209300  | H         | 0.64009600  | -0.62877700 | -4.39652700 |
| C          | -3.32802600 | 1.81658500  | -1.11400300 | H         | 1.16924300  | 1.05465900  | -4.48879600 |
| C          | -2.04638400 | 2.55732400  | -0.74337500 | H         | 1.48334100  | 1.15191500  | -1.97973800 |
| C          | -0.84880400 | 1.65644500  | -0.87356000 | H         | 2.41477400  | 1.64254400  | -1.78063100 |
| N          | -0.86289900 | 0.41061000  | -0.48366200 |           |             |             |             |
| H          | -4.20766200 | 2.37888900  | -0.79289500 | <b>M5</b> |             |             |             |
| H          | -2.09147600 | 2.86915700  | 0.31028900  | K         | -0.14579000 | 0.18780500  | -1.90199400 |
| H          | -3.38416100 | 1.72608900  | -2.20090500 | O         | 1.76116700  | -0.60163600 | -0.78617800 |
| H          | -1.91283200 | 3.45288700  | -1.34729400 | C         | 3.08334000  | -0.77025100 | -0.44259500 |
| H          | 0.12166700  | 2.12609100  | -0.97109900 | C         | 4.00106100  | -0.28673400 | -1.58788300 |
| <b>M4</b>  |             |             |             | C         | 3.41768400  | 0.04433300  | 0.82870700  |
| K          | 1.94347500  | 0.17297900  | -1.70289600 | C         | 3.38639300  | -2.26002100 | -0.16730000 |
| O          | 0.05759900  | 0.16695000  | 0.04651200  | H         | 3.77762900  | -0.85089400 | -2.49766900 |
| C          | -1.05405200 | -0.13698300 | 0.89675200  | H         | 3.80953400  | 0.77105300  | -1.79026300 |
| C          | -1.49535400 | 1.13275700  | 1.62905700  | H         | 5.06703300  | -0.40491000 | -1.36425500 |
| C          | -2.20224000 | -0.69637800 | 0.05146300  | H         | 2.81415300  | -0.30983300 | 1.66819200  |
| C          | -0.55538400 | -1.18529900 | 1.88683600  | H         | 4.47242200  | -0.02390900 | 1.11637800  |
| H          | -1.80827900 | 1.89550700  | 0.91343100  | H         | 4.43135600  | -2.44049900 | 0.10750900  |
| H          | -0.66920500 | 1.53804000  | 2.21666800  | H         | 2.75212600  | -2.62320400 | 0.64558800  |
| H          | -2.33228200 | 0.92921900  | 2.30141400  | H         | 3.15786600  | -2.85118200 | -1.05809900 |
| H          | -3.05766400 | -0.96727900 | 0.67527200  | C         | -3.12335600 | 0.66012100  | -0.35121900 |
| H          | -1.87459300 | -1.58735200 | -0.48857600 | C         | -2.24329600 | 0.04372600  | 0.54298300  |
| H          | -2.53158300 | 0.04275800  | -0.68099800 | C         | -1.31867500 | 0.82131300  | 1.26697700  |
| H          | -0.17853200 | 0.88296500  | -0.64104600 | C         | -1.28753700 | 2.19594200  | 1.05687000  |
| H          | 0.02058600  | 1.73386800  | -1.85985900 | C         | -2.15377200 | 2.80567400  | 0.15079200  |
| H          | -1.34537200 | -1.47204600 | 2.58413400  | C         | -3.07661200 | 2.03617100  | -0.55223100 |
| H          | -0.22343300 | -2.08154700 | 1.35771700  | H         | -3.83638600 | 0.04064200  | -0.88163100 |
| H          | 0.28683600  | -0.79498300 | 2.46197300  | H         | -0.56837200 | 2.79593800  | 1.60269500  |
| <b>TS4</b> |             |             |             | H         | -2.11057500 | 3.87704700  | -0.00008800 |
| K          | 1.97515300  | -0.26111200 | -0.11962800 | H         | -3.76069800 | 2.50480400  | -1.24862600 |
|            |             |             |             | C         | -0.40950100 | 0.11738700  | 2.24004900  |
|            |             |             |             | C         | -0.09575800 | -1.29283100 | 1.73997500  |

|            |             |             |            |            |             |             |             |
|------------|-------------|-------------|------------|------------|-------------|-------------|-------------|
| C          | -1.32675400 | -1.96284000 | 1.22350000 |            |             |             |             |
| N          | -2.31016200 | -1.36453800 | 0.66494100 | <b>M6</b>  |             |             |             |
| H          | 0.62406100  | -1.22978400 | 0.89844700 | K          | -0.52082200 | -0.64643500 | -2.20082400 |
| H          | -1.38485900 | -3.04930300 | 1.27703000 | O          | 1.48808000  | -1.03626300 | -0.56938200 |
| H          | 3.17347800  | 1.09663000  | 0.65994700 | C          | 2.87758300  | -0.72025500 | -0.34963400 |
| H          | 0.36983700  | -1.90159700 | 2.51636800 | C          | 3.40260200  | -0.24190200 | -1.69797800 |
| H          | 0.51117100  | 0.68506400  | 2.37859200 | C          | 2.98787700  | 0.38484300  | 0.70013100  |
| H          | -0.90920400 | 0.07017100  | 3.21536200 | C          | 3.60892800  | -1.98251100 | 0.10681200  |
|            |             |             |            | H          | 3.27157600  | -1.01674300 | -2.45693300 |
| <b>TSS</b> |             |             |            | H          | 2.87314100  | 0.65878800  | -2.01785800 |
| K          | -3.98007800 | -2.31714800 | 1.08431400 | H          | 4.46569600  | -0.00373000 | -1.63837100 |
| O          | -2.19524100 | -3.19827300 | 2.55625600 | H          | 2.60800500  | 0.03938200  | 1.66325700  |
| C          | -0.80778100 | -3.34689600 | 2.73673200 | H          | 4.02799100  | 0.68826200  | 0.83702900  |
| C          | -0.10510400 | -2.86076600 | 1.46266500 | H          | 4.67017900  | -1.78431100 | 0.27236000  |
| C          | -0.34030600 | -2.50290400 | 3.93354300 | H          | 3.18282700  | -2.35170300 | 1.04235900  |
| C          | -0.46792000 | -4.82591100 | 2.98042900 | H          | 3.51627200  | -2.76952700 | -0.64403500 |
| H          | -0.44385500 | -3.44322700 | 0.60170800 | C          | -2.56833600 | 0.98112800  | -0.54191000 |
| H          | -0.33833700 | -1.80782200 | 1.28108300 | C          | -1.86411800 | 0.13219600  | 0.34693500  |
| H          | 0.98216000  | -2.95815400 | 1.53065100 | C          | -1.11820500 | 0.75691800  | 1.38900200  |
| H          | -0.83053300 | -2.83848200 | 4.84950800 | C          | -1.05405900 | 2.14210000  | 1.44882800  |
| H          | 0.74078800  | -2.56958000 | 4.08326600 | C          | -1.72751300 | 2.96199500  | 0.54232700  |
| H          | 0.60636300  | -4.98421400 | 3.11035100 | C          | -2.50240600 | 2.36457700  | -0.44733000 |
| H          | -0.97632700 | -5.18689300 | 3.87677600 | H          | -3.20059800 | 0.51532900  | -1.29303500 |
| H          | -0.80731000 | -5.43077700 | 2.13640800 | H          | -0.46516700 | 2.59848600  | 2.23934000  |
| C          | -6.83449500 | -1.87884800 | 2.63000500 | H          | -1.66295100 | 4.03978800  | 0.62195100  |
| C          | -5.90028400 | -2.49903000 | 3.47598500 | H          | -3.06379600 | 2.97666700  | -1.14445600 |
| C          | -5.01523000 | -1.68553000 | 4.22470000 | C          | -0.44543500 | -0.09786900 | 2.44738400  |
| C          | -5.07206100 | -0.30422900 | 4.07240800 | C          | -0.31503100 | -1.51908100 | 1.96458200  |
| C          | -5.99204500 | 0.30061800  | 3.21581900 | C          | -1.07576000 | -1.96574300 | 0.92865000  |
| C          | -6.88322900 | -0.49470500 | 2.50083000 | N          | -1.87170000 | -1.22261500 | 0.10793200  |
| H          | -7.51804900 | -2.51342100 | 2.07758400 | H          | 1.05193500  | -1.26739700 | 0.28194400  |
| H          | -4.38142100 | 0.31245200  | 4.63797300 | H          | -1.02596100 | -3.02270200 | 0.66976200  |
| H          | -6.01776900 | 1.37877100  | 3.11854600 | H          | 2.40711700  | 1.25788800  | 0.39817400  |
| H          | -7.61527500 | -0.03992400 | 1.84418000 | H          | 0.26062000  | -2.22616600 | 2.55050300  |
| C          | -4.04951700 | -2.35548000 | 5.17608300 | H          | 0.52918500  | 0.33303800  | 2.70700400  |
| C          | -3.70805000 | -3.74498300 | 4.65540400 | H          | -1.03026100 | -0.05419700 | 3.38147700  |
| C          | -4.80539800 | -4.43827500 | 4.06337100 |            |             |             |             |
| N          | -5.84589900 | -3.89888800 | 3.47734700 | <b>TS6</b> |             |             |             |
| H          | -2.88179200 | -3.53984400 | 3.59016400 | K          | 0.50581300  | -2.05823100 | -0.83505700 |
| H          | -4.74328700 | -5.52421800 | 3.98685700 | O          | 1.79899700  | -0.33663300 | 0.49819000  |
| H          | -0.60159800 | -1.45411800 | 3.77470800 | C          | 2.74472400  | 0.73329100  | 0.40254600  |
| H          | -3.11030400 | -4.35344800 | 5.33226200 | C          | 3.65105000  | 0.40301200  | -0.78151700 |
| H          | -3.14950000 | -1.74409400 | 5.28198200 | C          | 2.00253400  | 2.04954400  | 0.15702700  |
| H          | -4.51108400 | -2.39955200 | 6.17411000 | C          | 3.55908900  | 0.80768900  | 1.69658500  |



|           |             |             |             |                          |             |             |             |
|-----------|-------------|-------------|-------------|--------------------------|-------------|-------------|-------------|
| H         | 4.14710300  | -0.55788300 | -0.62645000 | H                        | 0.23498400  | -0.94990200 | -0.92168100 |
| H         | 3.07091800  | 0.35096000  | -1.70682400 | C                        | -2.00412700 | 0.53609300  | 0.20428000  |
| H         | 4.42158200  | 1.16620800  | -0.91258100 | C                        | -1.00137600 | 0.08466700  | 1.09573600  |
| H         | 1.33268900  | 2.26592100  | 0.98999600  | C                        | -0.80514200 | 0.82674100  | 2.29738300  |
| H         | 2.70167100  | 2.88260700  | 0.04814900  | C                        | -1.54775300 | 1.98308700  | 2.51854100  |
| H         | 4.30753500  | 1.60271700  | 1.64894200  | C                        | -2.51538500 | 2.42394700  | 1.61935500  |
| H         | 2.90144700  | 1.00235400  | 2.54541400  | C                        | -2.74661300 | 1.67695600  | 0.46394200  |
| H         | 4.07139300  | -0.14004800 | 1.87507500  | H                        | -2.16971900 | -0.03201500 | -0.70350300 |
| C         | -2.12616000 | 0.13098400  | -1.80983400 | H                        | -1.37666900 | 2.54163400  | 3.43396400  |
| C         | -2.10566900 | -0.40015100 | -0.49789900 | H                        | -3.08812100 | 3.31980700  | 1.82336900  |
| C         | -1.87244800 | 0.48520200  | 0.59200700  | H                        | -3.50777700 | 1.99068100  | -0.24147000 |
| C         | -1.69274100 | 1.85642500  | 0.33660600  | C                        | 0.16911100  | 0.30553500  | 3.33553800  |
| C         | -1.72810300 | 2.35151900  | -0.94748700 | C                        | 1.20896700  | -0.55259600 | 2.66426700  |
| C         | -1.94098400 | 1.47743800  | -2.02828300 | C                        | 0.91757500  | -1.16788600 | 1.49214600  |
| H         | -2.31762600 | -0.54859600 | -2.63250000 | N                        | -0.19371800 | -0.96345900 | 0.71475700  |
| H         | -1.50013000 | 2.51850100  | 1.17255200  | H                        | 2.12965800  | -0.78476800 | 3.18533000  |
| H         | -1.58185600 | 3.40875800  | -1.12852600 | H                        | 0.62206500  | 1.14091300  | 3.88009100  |
| H         | -1.96936200 | 1.86900200  | -3.03797700 | H                        | 1.63384900  | -1.87097100 | 1.07045400  |
| C         | -1.77036600 | -0.07797700 | 1.90868200  | H                        | -0.38002300 | -0.27239200 | 4.09849400  |
| C         | -2.20121600 | -1.40067400 | 2.06243000  | H                        | 2.57724300  | -2.46767400 | -1.88388900 |
| C         | -2.40162300 | -2.18122300 | 0.93160400  |                          |             |             |             |
| N         | -2.29907400 | -1.74941100 | -0.32785600 | <b>TS<sub>7-7a</sub></b> |             |             |             |
| H         | 1.13078500  | -0.17007000 | 1.29562100  | K                        | 1.34870100  | 1.68391800  | -0.67183700 |
| H         | -2.65048900 | -3.23343200 | 1.04714900  | O                        | 0.92422900  | -0.51833300 | -1.74232700 |
| H         | 1.39888100  | 1.98172000  | -0.74969300 | C                        | 0.79540600  | -1.54626700 | -2.69377200 |
| H         | -2.28384000 | -1.84577300 | 3.04482500  | C                        | 1.51887400  | -1.10848700 | -3.97153500 |
| H         | 0.17529600  | -0.07590000 | 2.17983200  | C                        | 1.43020700  | -2.83688100 | -2.15321100 |
| H         | -1.73398400 | 0.58847700  | 2.75514400  | C                        | -0.69207200 | -1.79077200 | -2.99383300 |
|           |             |             |             | H                        | 1.07757100  | -0.18547900 | -4.35666800 |
| <b>M7</b> |             |             |             | H                        | 2.57368900  | -0.91863700 | -3.75755100 |
| K         | 1.24843600  | 1.42451200  | -0.29055500 | H                        | 1.46037100  | -1.86848100 | -4.75557000 |
| O         | 0.66623900  | -0.62206200 | -1.78200600 | H                        | 0.92228900  | -3.15163500 | -1.23883700 |
| C         | 0.75555300  | -1.67304400 | -2.74878900 | H                        | 1.37035000  | -3.65505900 | -2.87609400 |
| C         | 1.44493700  | -1.07068600 | -3.96818100 | H                        | -0.83692100 | -2.57298300 | -3.74414000 |
| C         | 1.58499800  | -2.82307500 | -2.17019900 | H                        | -1.21414900 | -2.09363500 | -2.08342700 |
| C         | -0.65401200 | -2.15343000 | -3.10302300 | H                        | -1.15497400 | -0.87230000 | -3.36270000 |
| H         | 0.86642700  | -0.22819900 | -4.35302400 | H                        | 0.45791900  | -0.77891500 | -0.62934000 |
| H         | 2.44185600  | -0.71155800 | -3.70226900 | C                        | -1.75298700 | 0.63303900  | 0.01799200  |
| H         | 1.54982300  | -1.80799500 | -4.76648300 | C                        | -0.81109300 | 0.18446800  | 0.96866500  |
| H         | 1.09966500  | -3.23509900 | -1.28288800 | C                        | -0.81227500 | 0.78525900  | 2.25352200  |
| H         | 1.70545900  | -3.63014800 | -2.89655900 | C                        | -1.70675100 | 1.81776800  | 2.51718100  |
| H         | -0.62501400 | -2.94388500 | -3.85680500 | C                        | -2.62177300 | 2.26468500  | 1.56752200  |
| H         | -1.15619500 | -2.54509400 | -2.21607400 | C                        | -2.64350600 | 1.65384000  | 0.31575300  |
| H         | -1.24809700 | -1.32517500 | -3.49444900 | H                        | -1.76562400 | 0.16066500  | -0.95629400 |

|            |             |             |             |            |             |             |             |
|------------|-------------|-------------|-------------|------------|-------------|-------------|-------------|
| H          | -1.69348900 | 2.27547000  | 3.50142300  | H          | 0.42656300  | 1.05683300  | 4.08394500  |
| H          | -3.31234700 | 3.06381900  | 1.80530000  | H          | 1.92769100  | -1.58768800 | 1.15318100  |
| H          | -3.35880900 | 1.97257200  | -0.43354100 | H          | -0.48626800 | -0.42744700 | 4.15490700  |
| C          | 0.12165200  | 0.26454000  | 3.32950200  | H          | 2.43412800  | -2.67335700 | -1.83459400 |
| C          | 1.27491000  | -0.47929100 | 2.71122900  |            |             |             |             |
| C          | 1.18259100  | -0.96814400 | 1.46098500  | <b>TS7</b> |             |             |             |
| N          | 0.12992500  | -0.75801100 | 0.59441000  | K          | -3.36839900 | -0.65138200 | 1.65015500  |
| H          | 2.14803400  | -0.69874700 | 3.31255100  | O          | -3.97051500 | -2.91737200 | 0.40191100  |
| H          | 0.47137800  | 1.09446100  | 3.95304100  | C          | -3.76523900 | -3.80970500 | -0.70848100 |
| H          | 1.98857700  | -1.56185600 | 1.04010600  | C          | -3.04772100 | -2.98527100 | -1.77074100 |
| H          | -0.43735700 | -0.39257700 | 4.01499000  | C          | -2.90105600 | -4.98640900 | -0.25354400 |
| H          | 2.48230100  | -2.66264000 | -1.91598800 | C          | -5.12301800 | -4.29505200 | -1.21695200 |
|            |             |             |             | H          | -3.65568200 | -2.12643900 | -2.06340400 |
| <b>M7a</b> |             |             |             | H          | -2.09003000 | -2.62146700 | -1.39125000 |
| K          | 1.27013000  | 1.59480100  | -0.93124700 | H          | -2.85310300 | -3.58386300 | -2.66217400 |
| O          | 0.78199200  | -0.59702800 | -1.78610400 | H          | -3.41051600 | -5.55781000 | 0.52556400  |
| C          | 0.75733200  | -1.62079400 | -2.72108700 | H          | -2.68817600 | -5.66291900 | -1.08395500 |
| C          | 1.53872500  | -1.19683000 | -3.97951000 | H          | -5.00663100 | -4.95497200 | -2.07931500 |
| C          | 1.40548000  | -2.89083800 | -2.13375000 | H          | -5.64867800 | -4.84777600 | -0.43503700 |
| C          | -0.69809700 | -1.94047800 | -3.11690100 | H          | -5.74326700 | -3.44616300 | -1.51067200 |
| H          | 1.09537800  | -0.29095500 | -4.40278900 | H          | -4.42177500 | -3.38953300 | 1.14180400  |
| H          | 2.57587300  | -0.97419000 | -3.71310500 | C          | -6.79317900 | -2.00633800 | 2.32161900  |
| H          | 1.54397000  | -1.96882200 | -4.75576800 | C          | -5.69707600 | -2.35944400 | 3.14431000  |
| H          | 0.85563000  | -3.21204600 | -1.24530500 | C          | -5.29760300 | -1.45968700 | 4.17217800  |
| H          | 1.42194100  | -3.72370700 | -2.84364300 | C          | -6.01182300 | -0.26047600 | 4.35332000  |
| H          | -0.76781900 | -2.74126500 | -3.85997500 | C          | -7.07812600 | 0.05973600  | 3.54288900  |
| H          | -1.26353700 | -2.24590200 | -2.23274500 | C          | -7.46691700 | -0.82274200 | 2.51648100  |
| H          | -1.17364300 | -1.04689300 | -3.52959200 | H          | -7.08475100 | -2.69468900 | 1.53807200  |
| H          | 0.23466600  | -0.91308000 | -0.27026800 | H          | -5.68695700 | 0.42395300  | 5.12828900  |
| C          | -1.81215300 | 0.62494100  | 0.15910800  | H          | -7.61737900 | 0.98691700  | 3.69131200  |
| C          | -0.88624200 | 0.17346800  | 1.11549300  | H          | -8.30596600 | -0.56838200 | 1.88007600  |
| C          | -0.87690400 | 0.75376200  | 2.40106600  | C          | -4.10891600 | -1.77060400 | 4.92160300  |
| C          | -1.77259400 | 1.78295300  | 2.67466700  | C          | -3.61865600 | -3.07769200 | 4.79760700  |
| C          | -2.68364900 | 2.23725300  | 1.72574100  | C          | -4.07576400 | -3.87618500 | 3.75962300  |
| C          | -2.70169000 | 1.64476800  | 0.46578500  | N          | -5.04015200 | -3.53861800 | 2.90045200  |
| H          | -1.81306200 | 0.16278500  | -0.82071600 | H          | -2.81479600 | -3.42867000 | 5.43050900  |
| H          | -1.76007800 | 2.23256700  | 3.66202200  | H          | -2.78853500 | -0.56288200 | 4.07637100  |
| H          | -3.37480000 | 3.03381600  | 1.97003400  | H          | -3.62128800 | -4.84941400 | 3.59504100  |
| H          | -3.41209800 | 1.97528100  | -0.28248200 | H          | -3.87541500 | -1.17635400 | 5.78948500  |
| C          | 0.06742600  | 0.22796100  | 3.46544200  | H          | -1.95304300 | -4.62744300 | 0.15160000  |
| C          | 1.21723400  | -0.52092600 | 2.84619800  |            |             |             |             |
| C          | 1.13239800  | -1.00360600 | 1.60002300  | <b>M8</b>  |             |             |             |
| N          | 0.04555400  | -0.79647100 | 0.76684900  | K          | 1.08726500  | -2.45882300 | -0.39522800 |
| H          | 2.09566400  | -0.72891700 | 3.44250600  | O          | 2.33753500  | -0.67624700 | 0.45393500  |

|           |             |             |             |            |             |             |             |
|-----------|-------------|-------------|-------------|------------|-------------|-------------|-------------|
| C         | 2.87318600  | 0.56888800  | 0.67500700  | H          | -1.13675000 | -4.21342900 | -1.25286500 |
| C         | 2.69121800  | 1.46118400  | -0.57503900 | H          | -1.15035700 | -2.78076200 | -0.21030600 |
| C         | 2.17008400  | 1.25336900  | 1.87028500  | H          | 0.67802000  | -4.39573500 | -3.10851600 |
| C         | 4.38313700  | 0.46377300  | 0.98860300  | H          | 0.20347000  | -2.79499900 | -3.70365200 |
| H         | 3.18314200  | 0.99247900  | -1.43211000 | H          | 1.88577800  | -3.10515500 | -3.24833900 |
| H         | 1.62706000  | 1.55413700  | -0.80719900 | C          | -1.64512900 | 0.59448400  | 0.08732700  |
| H         | 3.10548500  | 2.46853700  | -0.45119700 | C          | -0.50554900 | 0.88197200  | 0.85275700  |
| H         | 2.29978500  | 0.64685400  | 2.77029800  | C          | -0.55744200 | 1.93938400  | 1.79554600  |
| H         | 2.55505500  | 2.25854500  | 2.07578000  | C          | -1.73970600 | 2.66259300  | 1.94688300  |
| H         | 4.85404600  | 1.43679500  | 1.16851900  | C          | -2.86984100 | 2.36684700  | 1.19173900  |
| H         | 4.53014500  | -0.15939100 | 1.87474300  | C          | -2.81086200 | 1.33060700  | 0.26219800  |
| H         | 4.89730400  | -0.01828600 | 0.15245000  | H          | -1.60096600 | -0.21880900 | -0.62705400 |
| C         | -1.46033700 | -0.14055400 | -2.00384100 | H          | -1.76698900 | 3.47162300  | 2.66891200  |
| C         | -1.67304400 | -0.10522300 | -0.60604800 | H          | -3.78252900 | 2.93254900  | 1.32747600  |
| C         | -1.97724700 | 1.14259800  | 0.01386000  | H          | -3.68504700 | 1.08437600  | -0.32905900 |
| C         | -2.03495600 | 2.31222900  | -0.77987100 | C          | 0.66369800  | 2.24689600  | 2.52908000  |
| C         | -1.81080300 | 2.24818700  | -2.13051000 | C          | 1.71711000  | 1.42459000  | 2.49304800  |
| C         | -1.52634500 | 1.01036500  | -2.74655800 | C          | 1.64643000  | 0.12709100  | 1.73631600  |
| H         | -1.25612500 | -1.09524700 | -2.47363400 | N          | 0.69058600  | 0.22542900  | 0.64007200  |
| H         | -2.25478200 | 3.25831300  | -0.29980100 | H          | 1.38172500  | -0.68895400 | 2.43330000  |
| H         | -1.85063700 | 3.14739600  | -2.73181300 | H          | 0.65936500  | -0.59282300 | -0.01411100 |
| H         | -1.35747300 | 0.97391200  | -3.81540500 | H          | 2.62121600  | -0.13692000 | 1.32006300  |
| C         | -2.19491400 | 1.14650600  | 1.40962300  | H          | 0.69499300  | 3.16277400  | 3.10965600  |
| C         | -2.11019900 | -0.02768800 | 2.10683200  | H          | 2.61856400  | 1.64206200  | 3.05352400  |
| C         | -1.78538700 | -1.20851200 | 1.40835800  |            |             |             |             |
| N         | -1.56442900 | -1.26105500 | 0.11251000  | <b>TS8</b> |             |             |             |
| H         | 1.63625300  | -1.80255900 | 2.27253900  | K          | 0.70280000  | 1.12519300  | -1.57678900 |
| H         | -1.69195000 | -2.14137300 | 1.95600700  | O          | 0.61839800  | -1.33501400 | -1.22961000 |
| H         | 1.09850500  | 1.32743700  | 1.66879600  | C          | 0.52973300  | -2.72852600 | -1.41584200 |
| H         | -2.26729500 | -0.06382900 | 3.17630900  | C          | 1.51289300  | -3.43917000 | -0.47277200 |
| H         | 1.32385000  | -2.30856400 | 2.74053100  | C          | -0.90242300 | -3.19978100 | -1.11966600 |
| H         | -2.41892000 | 2.08060000  | 1.91106600  | C          | 0.88935100  | -3.03468100 | -2.87204900 |
|           |             |             |             | H          | 2.53069900  | -3.08996800 | -0.66220000 |
| <b>M9</b> |             |             |             | H          | 1.26505100  | -3.21498100 | 0.56705900  |
| K         | 1.36525000  | 0.75632300  | -2.17956200 | H          | 1.49123300  | -4.52477500 | -0.60127500 |
| O         | 0.76943600  | -1.45403200 | -1.48899900 | H          | -1.60755500 | -2.68713000 | -1.77822100 |
| C         | 0.54869900  | -2.81773200 | -1.56305800 | H          | -1.01692000 | -4.27723600 | -1.26677100 |
| C         | 1.46952400  | -3.55787900 | -0.57120200 | H          | -1.16916100 | -2.96541200 | -0.08691000 |
| C         | -0.91906800 | -3.14107300 | -1.21571800 | H          | 0.85066900  | -4.10629400 | -3.08554500 |
| C         | 0.84496400  | -3.32003700 | -2.99036700 | H          | 0.19333800  | -2.52711800 | -3.54479400 |
| H         | 2.51358400  | -3.32333600 | -0.79505900 | H          | 1.89853900  | -2.67763700 | -3.09174400 |
| H         | 1.26112200  | -3.22252600 | 0.44834100  | C          | -2.00552600 | 0.41102300  | 0.38632000  |
| H         | 1.34543800  | -4.64519900 | -0.60393700 | C          | -0.77337400 | 0.61865000  | 1.05818900  |
| H         | -1.58571300 | -2.63247600 | -1.91732900 | C          | -0.58007300 | 1.89009500  | 1.69487400  |

|            |             |             |             |            |             |             |             |
|------------|-------------|-------------|-------------|------------|-------------|-------------|-------------|
| C          | -1.60995700 | 2.83175800  | 1.70086500  | C          | 1.79363800  | 1.22620200  | 2.13160500  |
| C          | -2.82789700 | 2.58554100  | 1.07801000  | C          | 1.35295800  | -0.21191800 | 2.01884500  |
| C          | -3.00428300 | 1.37161100  | 0.40788500  | N          | 0.21414200  | -0.39693200 | 1.12546000  |
| H          | -2.16218100 | -0.53361900 | -0.11985800 | H          | 1.11960500  | -0.59537800 | 3.03162300  |
| H          | -1.43659800 | 3.78541200  | 2.18993500  | H          | 0.45940200  | -1.19864500 | -0.26276800 |
| H          | -3.61996900 | 3.32258700  | 1.10378000  | H          | 2.17844700  | -0.83482000 | 1.65893800  |
| H          | -3.94349800 | 1.16628900  | -0.09375200 | H          | 1.16653600  | 3.24791700  | 2.12750700  |
| C          | 0.76605600  | 2.19188500  | 2.15435400  | H          | 2.82903000  | 1.44804500  | 2.36886900  |
| C          | 1.70793500  | 1.23983400  | 2.20452500  |            |             |             |             |
| C          | 1.34023000  | -0.19139300 | 1.90824300  | <b>TS9</b> |             |             |             |
| N          | 0.21785500  | -0.30222800 | 0.98670500  | K          | -3.23322300 | -2.83430600 | 0.46193800  |
| H          | 1.11989200  | -0.71127600 | 2.85937700  | O          | -4.39804100 | -5.18996800 | 0.80916500  |
| H          | 0.38132200  | -0.97433500 | -0.10452200 | C          | -4.25140100 | -6.61637400 | 0.86510400  |
| H          | 2.19035600  | -0.72643500 | 1.47401100  | C          | -3.07737400 | -6.97081900 | 1.78118900  |
| H          | 0.99967900  | 3.22044100  | 2.41217000  | C          | -5.54972700 | -7.23083900 | 1.39186000  |
| H          | 2.72431500  | 1.47132200  | 2.50466100  | C          | -3.97735200 | -7.06846600 | -0.56465900 |
|            |             |             |             | H          | -2.16316800 | -6.48439000 | 1.43475900  |
| <b>M10</b> |             |             |             | H          | -3.27468500 | -6.63991500 | 2.80302300  |
| K          | 0.52710500  | 1.15030800  | -1.44847600 | H          | -2.90660500 | -8.04946700 | 1.80277600  |
| O          | 0.67232400  | -1.40848500 | -1.24939200 | H          | -6.38735300 | -6.95460100 | 0.74848700  |
| C          | 0.61718900  | -2.81217800 | -1.50798000 | H          | -5.48620700 | -8.32079400 | 1.42885600  |
| C          | 1.61312600  | -3.53223800 | -0.59428700 | H          | -5.76035100 | -6.86722300 | 2.40006100  |
| C          | -0.80496300 | -3.32020100 | -1.25195500 | H          | -3.87322400 | -8.15376000 | -0.61785300 |
| C          | 0.99986200  | -2.99675600 | -2.97332900 | H          | -4.79581100 | -6.76871200 | -1.22227300 |
| H          | 2.61967100  | -3.13806900 | -0.74921400 | H          | -3.05429700 | -6.61878300 | -0.93795700 |
| H          | 1.34482900  | -3.38077700 | 0.45330900  | C          | -6.57191200 | -2.78682900 | 2.37237700  |
| H          | 1.62813500  | -4.60687000 | -0.79058400 | C          | -5.42537600 | -2.72153100 | 3.19564500  |
| H          | -1.51636200 | -2.79323800 | -1.89143500 | C          | -5.33529200 | -1.66963400 | 4.15344100  |
| H          | -0.88723300 | -4.39058500 | -1.45567300 | C          | -6.37784600 | -0.73423900 | 4.25207900  |
| H          | -1.08710800 | -3.14713100 | -0.21166200 | C          | -7.48503400 | -0.81210200 | 3.42903000  |
| H          | 0.98984400  | -4.05196400 | -3.25393800 | C          | -7.57833200 | -1.84840000 | 2.48887900  |
| H          | 0.29763700  | -2.46513600 | -3.61983000 | H          | -6.64951200 | -3.59821500 | 1.65819200  |
| H          | 2.00195600  | -2.60250700 | -3.15619000 | H          | -6.30016900 | 0.05711300  | 4.98966100  |
| C          | -1.97972600 | 0.34759700  | 0.48130100  | H          | -8.28060500 | -0.08273100 | 3.51378700  |
| C          | -0.72487000 | 0.56444000  | 1.12513100  | H          | -8.45034800 | -1.91592700 | 1.84926400  |
| C          | -0.47852100 | 1.90392600  | 1.60698000  | C          | -4.17940500 | -1.65138200 | 5.00109200  |
| C          | -1.46460500 | 2.88671100  | 1.49611700  | C          | -3.18100200 | -2.53792600 | 4.79212200  |
| C          | -2.69740500 | 2.62729300  | 0.90905600  | C          | -3.29165400 | -3.49344000 | 3.72318600  |
| C          | -2.93260800 | 1.34696200  | 0.39191400  | N          | -4.44499600 | -3.66651700 | 3.06132700  |
| H          | -2.18386700 | -0.64191300 | 0.08905500  | H          | -2.60787700 | -4.32863400 | 3.70666400  |
| H          | -1.24262800 | 3.88404400  | 1.86483200  | H          | -4.50665500 | -4.81372200 | 1.73016900  |
| H          | -3.45579200 | 3.39694500  | 0.84884600  | H          | -1.98065400 | -2.69489000 | 2.56444700  |
| H          | -3.88475300 | 1.12594100  | -0.07849800 | H          | -4.11590700 | -0.91065300 | 5.79004200  |
| C          | 0.88655400  | 2.20611500  | 2.00039900  | H          | -2.27562100 | -2.52673600 | 5.38458000  |

|             |             |             |             |                         |             |             |             |
|-------------|-------------|-------------|-------------|-------------------------|-------------|-------------|-------------|
|             |             |             |             | H                       | 2.99466300  | -0.42398100 | 6.57513100  |
| <b>M11</b>  |             |             |             | H                       | 3.79847300  | -0.85221300 | 5.05494400  |
| K           | -0.60278400 | -2.18694100 | 0.91174800  | H                       | 4.37401400  | 0.52680900  | 6.00126100  |
| O           | -0.27812400 | 0.26580400  | 1.86147000  | H                       | 2.48508700  | 2.03846600  | 3.08255800  |
| C           | 0.76644200  | 0.97389300  | 2.57002600  | H                       | 4.06546200  | 2.02362000  | 3.87799800  |
| C           | 1.11613500  | 0.08949600  | 3.76062500  | H                       | 3.49272100  | 0.59295400  | 3.00492600  |
| C           | 1.97059500  | 1.15168400  | 1.64675800  | H                       | 2.89037600  | 2.68070100  | 6.11327900  |
| C           | 0.22428700  | 2.32434400  | 3.03550300  | H                       | 1.33812400  | 2.67100300  | 5.26355900  |
| H           | 0.23383600  | -0.08823100 | 4.37832500  | H                       | 1.56103800  | 1.66490300  | 6.70107700  |
| H           | 1.50975800  | -0.87418200 | 3.42716500  | C                       | 2.46746700  | -1.64466400 | 0.25579800  |
| H           | 1.87908600  | 0.56317700  | 4.38013300  | C                       | 1.70161900  | -0.46897600 | 0.43498100  |
| H           | 1.70820400  | 1.75749100  | 0.77866800  | C                       | 2.32885100  | 0.78167100  | 0.15277700  |
| H           | 2.79284700  | 1.64341800  | 2.17087100  | C                       | 3.66922500  | 0.81362800  | -0.25581700 |
| H           | 2.32360300  | 0.18557200  | 1.28146600  | C                       | 4.40329800  | -0.35021200 | -0.39500900 |
| H           | 0.97820700  | 2.87367000  | 3.60300000  | C                       | 3.78838800  | -1.58421700 | -0.14274900 |
| H           | -0.06646600 | 2.93784100  | 2.18003000  | H                       | 1.98567400  | -2.60367800 | 0.41497100  |
| H           | -0.65330000 | 2.18361500  | 3.66893600  | H                       | 4.12835800  | 1.77498200  | -0.46002500 |
| C           | 0.41576000  | -1.68020000 | -1.99684500 | H                       | 5.43924900  | -0.31117300 | -0.70667100 |
| C           | -0.43900900 | -0.59332800 | -1.62592400 | H                       | 4.35226200  | -2.50100800 | -0.26943500 |
| C           | 0.14617400  | 0.72654000  | -1.72950000 | C                       | 1.52427900  | 1.96035300  | 0.29078600  |
| C           | 1.44381100  | 0.89215200  | -2.20825800 | C                       | 0.26516700  | 1.86065300  | 0.76677200  |
| C           | 2.23179900  | -0.18669500 | -2.59666500 | C                       | -0.25481000 | 0.56831100  | 1.15035800  |
| C           | 1.69831900  | -1.47452700 | -2.47367200 | N                       | 0.40330700  | -0.56765900 | 0.84656700  |
| H           | 0.00059200  | -2.68456300 | -1.97734800 | H                       | 0.75044700  | 0.58524300  | 3.99917900  |
| H           | 1.85153300  | 1.89810000  | -2.25528300 | H                       | -0.35982100 | 2.73313300  | 0.90899800  |
| H           | 3.23228100  | -0.03473700 | -2.97997400 | H                       | 1.94447000  | 2.92079200  | 0.01331900  |
| H           | 2.29223400  | -2.33112900 | -2.77516300 | H                       | -0.28752100 | 0.81491900  | 2.92849700  |
| C           | -0.60286700 | 1.80278000  | -1.11686800 | H                       | -1.32767000 | 0.47673500  | 1.24633000  |
| C           | -1.86706000 | 1.60978500  | -0.70430200 |                         |             |             |             |
| C           | -2.55942400 | 0.30936800  | -1.03217400 |                         |             |             |             |
| N           | -1.64999600 | -0.83090000 | -1.11008400 | <b>M1<sub>Nap</sub></b> |             |             |             |
| H           | -0.57083200 | 0.79845400  | 1.09898600  | K                       | 0.17274600  | 0.90332100  | -1.78359800 |
| H           | -2.41496000 | 2.39168000  | -0.18843200 | O                       | 0.60662700  | -1.36835400 | -1.64632900 |
| H           | -0.09858500 | 2.74907300  | -0.94289100 | C                       | 0.85980200  | -2.71475700 | -1.72523800 |
| H           | -3.33074800 | 0.09598600  | -0.28405400 | C                       | 1.92678800  | -3.12888800 | -0.68594400 |
| H           | -3.11197200 | 0.43177800  | -1.98625300 | C                       | -0.43000200 | -3.52188300 | -1.45044700 |
|             |             |             |             | C                       | 1.37920600  | -3.08540800 | -3.13381200 |
| <b>TS10</b> |             |             |             | H                       | 2.84077100  | -2.55264500 | -0.85318200 |
| K           | 0.34383600  | -1.88342700 | 3.22744000  | H                       | 1.56858400  | -2.90164300 | 0.32080000  |
| O           | 1.39907000  | 0.07365600  | 4.57705400  | H                       | 2.17819500  | -4.19456600 | -0.72855200 |
| C           | 2.52807600  | 0.89364000  | 4.92304300  | H                       | -1.19588100 | -3.24541300 | -2.18007600 |
| C           | 3.48221900  | -0.01861200 | 5.68612500  | H                       | -0.28081500 | -4.60624700 | -1.50002400 |
| C           | 3.18475600  | 1.41969500  | 3.64653600  | H                       | -0.81105800 | -3.27359100 | -0.45624200 |
| C           | 2.05365900  | 2.04902100  | 5.80571600  | H                       | 1.59169700  | -4.15427900 | -3.24971100 |

|                          |             |             |             |                         |             |             |             |
|--------------------------|-------------|-------------|-------------|-------------------------|-------------|-------------|-------------|
| H                        | 0.63581400  | -2.79977400 | -3.88328500 | C                       | -0.83928400 | 2.88536900  | 0.74185500  |
| H                        | 2.29704600  | -2.52859600 | -3.34255600 | C                       | -2.14508900 | 2.94224100  | 0.24103400  |
| C                        | -2.09237500 | 0.71692400  | 0.73339500  | C                       | -2.91400700 | 1.77334300  | 0.26615600  |
| C                        | -0.84827100 | 0.70848900  | 1.37769400  | H                       | -2.99573300 | -0.30837400 | 0.75732200  |
| C                        | -0.16226200 | 1.92208600  | 1.54426600  | H                       | -0.24049900 | 3.79094500  | 0.77127700  |
| C                        | -0.73302300 | 3.10015300  | 1.04592800  | H                       | -2.56263300 | 3.87660300  | -0.11125300 |
| C                        | -1.96273100 | 3.09486200  | 0.40086500  | H                       | -3.94158600 | 1.79572300  | -0.08021600 |
| C                        | -2.65114800 | 1.89164200  | 0.24728300  | C                       | 1.12722900  | 1.64124200  | 1.74458500  |
| H                        | -2.61770600 | -0.22252300 | 0.60378000  | C                       | 1.22125600  | 0.62410600  | 2.88668300  |
| H                        | -0.20160300 | 4.03662900  | 1.17807600  | C                       | 0.84105000  | -0.77260000 | 2.38528600  |
| H                        | -2.38676700 | 4.01987500  | 0.02994600  | C                       | -0.42355300 | -0.76995400 | 1.51891600  |
| H                        | -3.61486500 | 1.87107400  | -0.24649700 | H                       | 1.45019100  | 2.63402000  | 2.06929400  |
| C                        | 1.19320000  | 1.97589800  | 2.21863400  | H                       | 0.53911700  | 0.93213300  | 3.68582300  |
| C                        | 1.50969700  | 0.72258600  | 3.03316100  | H                       | 0.71346400  | -1.43936200 | 3.24445600  |
| C                        | 1.21100200  | -0.52693400 | 2.20886100  | H                       | -0.02078600 | -1.12569200 | 0.14386500  |
| C                        | -0.27494900 | -0.60503600 | 1.86396700  | H                       | 1.81929400  | 1.32891800  | 0.95039900  |
| H                        | 1.24924800  | 2.87016100  | 2.84470700  | H                       | 2.23015700  | 0.61877300  | 3.30810200  |
| H                        | 0.90195900  | 0.71276000  | 3.94450600  | H                       | 1.69485900  | -1.17454600 | 1.82442300  |
| H                        | 1.51239100  | -1.42965500 | 2.74416100  | H                       | -1.14070200 | -1.55098900 | 1.77294000  |
| H                        | -0.43492600 | -1.36008900 | 1.09164500  |                         |             |             |             |
| H                        | 1.96370000  | 2.09998900  | 1.44733200  | <b>M2<sub>Nap</sub></b> |             |             |             |
| H                        | 2.55537600  | 0.74202900  | 3.34857900  | K                       | -0.37822400 | 1.06759700  | -1.83937800 |
| H                        | 1.79355000  | -0.50442300 | 1.28251500  | O                       | 0.57315200  | -1.19708100 | -1.02696000 |
| H                        | -0.84000600 | -0.92403600 | 2.74732900  | C                       | 0.85613600  | -2.55006000 | -1.41340500 |
|                          |             |             |             | C                       | 1.97465300  | -3.10753300 | -0.53157900 |
| <b>TS1<sub>Nap</sub></b> |             |             |             | C                       | -0.41415500 | -3.39232300 | -1.27386800 |
| K                        | -0.56761300 | 0.96824800  | -1.87862100 | C                       | 1.30244900  | -2.48283400 | -2.87035400 |
| O                        | 0.28091400  | -1.23050600 | -1.00299600 | H                       | 2.86273500  | -2.47695400 | -0.60349100 |
| C                        | 0.58642700  | -2.55342100 | -1.39361800 | H                       | 1.65969100  | -3.13660400 | 0.51285200  |
| C                        | 1.69585300  | -3.12548900 | -0.49995400 | H                       | 2.24518900  | -4.12178300 | -0.83365500 |
| C                        | -0.67140300 | -3.42891100 | -1.28989200 | H                       | -1.21606100 | -2.97413000 | -1.88611600 |
| C                        | 1.06927100  | -2.50770300 | -2.84671500 | H                       | -0.24180100 | -4.42391900 | -1.58960800 |
| H                        | 2.57806600  | -2.48320800 | -0.54249600 | H                       | -0.75137800 | -3.40435500 | -0.23582700 |
| H                        | 1.36174400  | -3.17545000 | 0.53754700  | H                       | 1.55428500  | -3.47506500 | -3.24936200 |
| H                        | 1.98640200  | -4.13187900 | -0.81306500 | H                       | 0.50542800  | -2.07604500 | -3.49839200 |
| H                        | -1.46700100 | -3.01796700 | -1.91634700 | H                       | 2.18356600  | -1.84518200 | -2.96882800 |
| H                        | -0.47949000 | -4.45741800 | -1.60815800 | C                       | -2.12737200 | 0.58442800  | 0.72217100  |
| H                        | -1.03222100 | -3.45110900 | -0.26002000 | C                       | -0.79427300 | 0.47838700  | 1.25272400  |
| H                        | 1.33726500  | -3.50090500 | -3.21709300 | C                       | -0.01058900 | 1.69632000  | 1.20365500  |
| H                        | 0.28520600  | -2.10851400 | -3.49686600 | C                       | -0.54376400 | 2.86285700  | 0.68639700  |
| H                        | 1.94828400  | -1.86392600 | -2.92973700 | C                       | -1.84206700 | 2.92946600  | 0.14740000  |
| C                        | -2.38134200 | 0.58561200  | 0.74487700  | C                       | -2.62387000 | 1.76359800  | 0.19762100  |
| C                        | -1.04255800 | 0.49118200  | 1.21121600  | H                       | -2.76371900 | -0.29389100 | 0.75640600  |
| C                        | -0.28268500 | 1.70233400  | 1.21240400  | H                       | 0.07120300  | 3.75910900  | 0.69513500  |

|                          |             |             |             |                          |             |             |             |
|--------------------------|-------------|-------------|-------------|--------------------------|-------------|-------------|-------------|
| H                        | -2.24558100 | 3.86193800  | -0.22429300 | C                        | -3.45859400 | -3.14952900 | 5.35016300  |
| H                        | -3.64375800 | 1.78637400  | -0.17362000 | H                        | -4.72777700 | -0.72197200 | 2.61466200  |
| C                        | 1.39757500  | 1.62769700  | 1.74032700  | H                        | -3.70043600 | -0.35112400 | 4.77774400  |
| C                        | 1.48320500  | 0.66633600  | 2.93139200  | H                        | -1.74862000 | -1.90976100 | 5.54236300  |
| C                        | 1.04973400  | -0.74191400 | 2.50881100  | H                        | -5.28138300 | -5.15239800 | 2.39409800  |
| C                        | -0.24411400 | -0.71959700 | 1.71774200  | H                        | -3.59839300 | -1.99985100 | 2.22676400  |
| H                        | 1.74742300  | 2.62686600  | 2.01473900  | H                        | -2.38333900 | -0.47028600 | 3.61072300  |
| H                        | 0.82336900  | 1.02986100  | 3.72552500  | H                        | -1.28608700 | -2.70977600 | 3.60966300  |
| H                        | 0.93679600  | -1.36559200 | 3.40332400  | H                        | -3.16781600 | -3.81501900 | 6.15793900  |
| H                        | 0.30734300  | -1.14981900 | -0.05300000 |                          |             |             |             |
| H                        | 2.08080200  | 1.25883300  | 0.96156700  | <b>TS3<sub>Nap</sub></b> |             |             |             |
| H                        | 2.49941600  | 0.65151500  | 3.33521700  | K                        | -0.01371200 | -0.19791100 | -0.96606900 |
| H                        | 1.87719100  | -1.19709400 | 1.94296100  | O                        | 1.22645700  | -2.22899300 | -0.12647300 |
| H                        | -0.92211400 | -1.55810200 | 1.85138300  | C                        | 2.20252700  | -3.21066500 | -0.47737600 |
|                          |             |             |             | C                        | 3.44064600  | -3.04068200 | 0.40989100  |
| <b>TS2<sub>Nap</sub></b> |             |             |             | C                        | 1.60607300  | -4.61086300 | -0.30308900 |
| K                        | -2.26261400 | -4.92500500 | 3.26735700  | C                        | 2.56327500  | -2.96636400 | -1.94186300 |
| O                        | -4.52533700 | -5.59807100 | 1.98229900  | H                        | 3.85853600  | -2.03872200 | 0.28963300  |
| C                        | -4.87589800 | -5.95506500 | 0.62278800  | H                        | 3.17340900  | -3.17482200 | 1.45913500  |
| C                        | -6.08254200 | -6.89108500 | 0.65195100  | H                        | 4.21498600  | -3.76853500 | 0.15432900  |
| C                        | -5.18500800 | -4.68375800 | -0.16554100 | H                        | 0.71053500  | -4.71687000 | -0.91930200 |
| C                        | -3.64726100 | -6.66156800 | 0.06382000  | H                        | 2.32015500  | -5.38562400 | -0.59356400 |
| H                        | -5.85990400 | -7.78362400 | 1.23915100  | H                        | 1.32160900  | -4.77349000 | 0.73762200  |
| H                        | -6.94337900 | -6.39149400 | 1.10254800  | H                        | 3.31400300  | -3.68026300 | -2.28862200 |
| H                        | -6.36216500 | -7.19943900 | -0.35737000 | H                        | 1.67903900  | -3.07302900 | -2.57546700 |
| H                        | -4.33487000 | -3.99977400 | -0.13830500 | H                        | 2.96960600  | -1.95997400 | -2.07342000 |
| H                        | -5.40786100 | -4.91720200 | -1.20853400 | C                        | -1.15068900 | 2.10325400  | 1.03049700  |
| H                        | -6.04889500 | -4.16889000 | 0.25881400  | C                        | -0.32885600 | 1.17161200  | 1.70382800  |
| H                        | -3.83167100 | -7.00320600 | -0.95560300 | C                        | 1.08109100  | 1.36715700  | 1.63794600  |
| H                        | -2.78795100 | -5.98686700 | 0.03597100  | C                        | 1.59487600  | 2.44274900  | 0.92677700  |
| H                        | -3.39357000 | -7.53119500 | 0.67352800  | C                        | 0.76574800  | 3.35098600  | 0.25923000  |
| C                        | -5.60718300 | -4.39970300 | 5.13675300  | C                        | -0.61366800 | 3.17233600  | 0.32106000  |
| C                        | -4.73340200 | -3.37872400 | 4.71093100  | H                        | -2.22747600 | 1.98029400  | 1.08254400  |
| C                        | -5.12675700 | -2.59296700 | 3.59368200  | H                        | 2.67120200  | 2.57753900  | 0.88959800  |
| C                        | -6.34434500 | -2.83643700 | 2.97716100  | H                        | 1.19208300  | 4.18490600  | -0.28355900 |
| C                        | -7.19940500 | -3.85505200 | 3.41043800  | H                        | -1.27557400 | 3.87135400  | -0.17704500 |
| C                        | -6.81704600 | -4.63727900 | 4.49732600  | C                        | 1.99186400  | 0.34231100  | 2.28527700  |
| H                        | -5.32311300 | -5.00832300 | 5.98865300  | C                        | 1.32142400  | -0.40316600 | 3.43981000  |
| H                        | -6.63157600 | -2.22582400 | 2.12746900  | C                        | -0.07169100 | -0.84892400 | 3.07462300  |
| H                        | -8.14428000 | -4.02621500 | 2.91053500  | C                        | -0.87374300 | 0.02686200  | 2.38708100  |
| H                        | -7.46391500 | -5.43241500 | 4.84882100  | H                        | 2.91198600  | 0.82438100  | 2.62431200  |
| C                        | -4.16714300 | -1.55333000 | 3.04927700  | H                        | 1.23720100  | 0.26642700  | 4.30722300  |
| C                        | -3.17819500 | -1.03620000 | 4.09497100  | H                        | -0.53126300 | -1.59305900 | 3.70833100  |
| C                        | -2.60890700 | -2.15027200 | 4.93608500  | H                        | 0.92220700  | -2.35557900 | 0.89923900  |

|                         |             |             |             |                        |             |             |             |
|-------------------------|-------------|-------------|-------------|------------------------|-------------|-------------|-------------|
| H                       | 2.28174000  | -0.39318800 | 1.52904700  | <b>M1<sub>t</sub></b>  |             |             |             |
| H                       | 1.93423700  | -1.25158200 | 3.74280800  | O                      | -1.87540500 | 1.01660300  | -1.69342400 |
| H                       | 0.51301100  | -2.35441600 | 2.06621500  | C                      | -2.95759900 | 0.71526500  | -0.91164200 |
| H                       | -1.94015400 | -0.15442800 | 2.30690200  | C                      | -3.13935900 | -0.82000800 | -0.76982600 |
|                         |             |             |             | C                      | -2.80064700 | 1.31097300  | 0.51142400  |
| <b>M3<sub>Nap</sub></b> |             |             |             | C                      | -4.24346500 | 1.29697700  | -1.54564100 |
| K                       | -1.10770500 | -0.11745600 | -1.61562200 | H                      | -3.20925000 | -1.26624500 | -1.76544300 |
| O                       | 0.50691700  | -1.73638000 | -1.09788600 | H                      | -2.26796700 | -1.24990100 | -0.26907200 |
| C                       | 1.42522100  | -2.75750600 | -1.17979000 | H                      | -4.03313600 | -1.10129000 | -0.19946400 |
| C                       | 2.27156100  | -2.84205000 | 0.11217900  | H                      | -2.68128500 | 2.39574100  | 0.44045800  |
| C                       | 0.70768900  | -4.11214700 | -1.37844700 | H                      | -3.65405600 | 1.09899300  | 1.16775700  |
| C                       | 2.37765500  | -2.52665500 | -2.37370500 | H                      | -1.89903000 | 0.90698800  | 0.97857000  |
| H                       | 2.81765000  | -1.90786500 | 0.26308500  | H                      | -5.14614600 | 1.10915200  | -0.95071000 |
| H                       | 1.61370700  | -2.99149100 | 0.97258600  | H                      | -4.12599500 | 2.37713400  | -1.66762300 |
| H                       | 2.99909400  | -3.66053700 | 0.08964800  | H                      | -4.38680900 | 0.86518700  | -2.54020200 |
| H                       | 0.09499600  | -4.07187800 | -2.28349100 | C                      | 1.09379500  | 1.77305900  | 0.01983900  |
| H                       | 1.40141800  | -4.95482900 | -1.47163700 | C                      | 1.30853100  | 0.44544000  | -0.42722700 |
| H                       | 0.04394900  | -4.30772900 | -0.53246600 | C                      | 2.54221300  | -0.17750400 | -0.08917400 |
| H                       | 3.13661900  | -3.31004900 | -2.47884600 | C                      | 3.48111100  | 0.52326900  | 0.65816500  |
| H                       | 1.79965200  | -2.48384800 | -3.30137100 | C                      | 3.26477900  | 1.83110100  | 1.08665000  |
| H                       | 2.88884800  | -1.56794300 | -2.25241100 | C                      | 2.05353200  | 2.44395200  | 0.75544600  |
| C                       | -2.04951300 | 2.47701900  | 0.72832400  | H                      | 0.15295000  | 2.24325400  | -0.23994600 |
| C                       | -1.14529500 | 1.58016600  | 1.30871700  | H                      | 4.41210500  | 0.02470800  | 0.91465900  |
| C                       | 0.20759800  | 1.60001400  | 0.90333900  | H                      | 4.01526100  | 2.35561700  | 1.66498700  |
| C                       | 0.61309100  | 2.52602500  | -0.05421900 | H                      | 1.85575400  | 3.46087600  | 1.07789200  |
| C                       | -0.29523300 | 3.41886900  | -0.62405000 | C                      | 2.79179400  | -1.60021000 | -0.54006400 |
| C                       | -1.63114200 | 3.39048600  | -0.23515000 | C                      | 1.47393300  | -2.34188900 | -0.77737500 |
| H                       | -3.08687500 | 2.45966200  | 1.04340500  | C                      | 0.57417000  | -1.50508600 | -1.68526300 |
| H                       | 1.65025100  | 2.54010000  | -0.36878300 | N                      | 0.34589700  | -0.19079700 | -1.13701800 |
| H                       | 0.04172700  | 4.13244600  | -1.36551000 | H                      | 3.40277700  | -2.12606500 | 0.19974400  |
| H                       | -2.34147900 | 4.08182200  | -0.67106300 | H                      | 0.96370100  | -2.50212700 | 0.17761500  |
| C                       | 1.13447400  | 0.53176500  | 1.42593400  | H                      | -0.39526100 | -1.99062000 | -1.82192500 |
| C                       | 0.79210100  | 0.08286100  | 2.84822300  | H                      | -0.59924500 | 0.32012500  | -1.36321300 |
| C                       | -0.68833600 | -0.09282900 | 3.03325400  | H                      | 3.36924100  | -1.60317900 | -1.47311500 |
| C                       | -1.57174900 | 0.60803500  | 2.31648500  | H                      | 1.65677900  | -3.32327800 | -1.22361600 |
| H                       | 2.17146000  | 0.86797300  | 1.36789300  | H                      | 1.03893000  | -1.44897600 | -2.68426300 |
| H                       | 1.14921600  | 0.81654000  | 3.58462700  |                        |             |             |             |
| H                       | -1.03419200 | -0.77679200 | 3.80014100  | <b>TS1<sub>t</sub></b> |             |             |             |
| H                       | -1.40057900 | -2.30640800 | 0.09981800  | O                      | -3.99019700 | -5.93381200 | 2.20076100  |
| H                       | 1.04467200  | -0.32914500 | 0.74753800  | C                      | -4.05566600 | -5.99306300 | 0.81881600  |
| H                       | 1.31528200  | -0.84901000 | 3.07224700  | C                      | -2.88354600 | -5.21534600 | 0.17670700  |
| H                       | -2.10501900 | -2.33624800 | 0.36723400  | C                      | -3.96825000 | -7.46741700 | 0.38452200  |
| H                       | -2.63664100 | 0.49846000  | 2.49091600  | C                      | -5.38424400 | -5.39514500 | 0.30180800  |
|                         |             |             |             | H                      | -2.94787200 | -4.15719700 | 0.43985200  |



|                       |             |             |             |                       |             |             |             |
|-----------------------|-------------|-------------|-------------|-----------------------|-------------|-------------|-------------|
| H                     | -1.93634100 | -5.60072100 | 0.56313000  | H                     | 1.50359700  | -0.71474200 | -1.72276300 |
| H                     | -2.87165500 | -5.29520500 | -0.91626300 | C                     | -0.96949000 | -1.53889400 | -0.07973900 |
| H                     | -4.78696400 | -8.03242100 | 0.83768700  | C                     | -1.18138000 | -0.12434200 | -0.14489400 |
| H                     | -4.01978300 | -7.59160700 | -0.70318700 | C                     | -2.50605500 | 0.28943200  | -0.53186100 |
| H                     | -3.02887500 | -7.90002500 | 0.73888800  | C                     | -3.47912500 | -0.65391600 | -0.82617500 |
| H                     | -5.46515400 | -5.43015100 | -0.79071000 | C                     | -3.23636800 | -2.02873100 | -0.78186300 |
| H                     | -6.22748600 | -5.94517900 | 0.72727500  | C                     | -1.95906700 | -2.44964100 | -0.39370800 |
| H                     | -5.47265900 | -4.35426200 | 0.61951000  | H                     | 0.01068500  | -1.88128800 | 0.23072600  |
| C                     | -6.36409300 | -3.74804600 | 3.58120400  | H                     | -4.47091700 | -0.29960600 | -1.10032800 |
| C                     | -5.13061200 | -3.03914900 | 3.62401000  | H                     | -4.01490600 | -2.74185400 | -1.02333400 |
| C                     | -5.15778200 | -1.73165900 | 4.20292200  | H                     | -1.73625000 | -3.51107100 | -0.33355600 |
| C                     | -6.35083800 | -1.21229600 | 4.68738200  | C                     | -2.81582000 | 1.76987000  | -0.56541800 |
| C                     | -7.55433100 | -1.91393200 | 4.62096500  | C                     | -1.86916700 | 2.53157000  | 0.36310500  |
| C                     | -7.53623300 | -3.19479800 | 4.06102700  | C                     | -0.42723700 | 2.12864700  | 0.04145500  |
| H                     | -6.35450100 | -4.74632700 | 3.16179000  | N                     | -0.17521900 | 0.70831300  | 0.15647500  |
| H                     | -6.33612500 | -0.22168900 | 5.13555600  | H                     | -3.86066800 | 1.94365500  | -0.28675900 |
| H                     | -8.47130000 | -1.48191900 | 5.00235600  | H                     | -2.08835600 | 2.27179800  | 1.40433500  |
| H                     | -8.45399400 | -3.77126900 | 4.00118400  | H                     | 0.26620200  | 2.65849000  | 0.70561200  |
| C                     | -3.86316900 | -0.95567800 | 4.29772200  | H                     | 1.35638300  | 0.21207600  | 0.53369800  |
| C                     | -2.66595100 | -1.90803900 | 4.33003800  | H                     | -2.70029500 | 2.16522700  | -1.58328700 |
| C                     | -2.76647000 | -2.88357000 | 3.15700300  | H                     | -2.00179000 | 3.61345800  | 0.25779700  |
| N                     | -4.01003400 | -3.61823800 | 3.14763500  | H                     | -0.19885600 | 2.49728500  | -0.97814300 |
| H                     | -3.87377900 | -0.31222700 | 5.18314100  |                       |             |             |             |
| H                     | -2.67235200 | -2.47418700 | 5.26710100  | <b>TS<sub>t</sub></b> |             |             |             |
| H                     | -1.94406200 | -3.60522800 | 3.18920700  | O                     | -2.48210500 | 0.03337300  | -4.57146800 |
| H                     | -4.01670900 | -4.76023300 | 2.65716000  | C                     | -2.75808900 | 0.86695900  | -5.68545300 |
| H                     | -3.75612200 | -0.28709900 | 3.43355700  | C                     | -3.25258200 | 2.24505100  | -5.21820300 |
| H                     | -1.72388600 | -1.35328900 | 4.28511000  | C                     | -3.85420600 | 0.16144100  | -6.48373100 |
| H                     | -2.62944500 | -2.30945900 | 2.22275500  | C                     | -1.49653800 | 1.02781500  | -6.54559000 |
|                       |             |             |             | H                     | -2.47810700 | 2.74336700  | -4.63343400 |
| <b>M2<sub>t</sub></b> |             |             |             | H                     | -4.13675300 | 2.13134100  | -4.58721000 |
| O                     | 2.31683800  | -0.06815200 | 0.75674900  | H                     | -3.51335500 | 2.88544800  | -6.06646900 |
| C                     | 3.10195900  | -0.04340500 | -0.42008900 | H                     | -3.51455800 | -0.82938700 | -6.79319000 |
| C                     | 3.15034000  | 1.38053800  | -0.99638800 | H                     | -4.12747800 | 0.73065400  | -7.37670100 |
| C                     | 4.50653900  | -0.49022500 | -0.01336900 | H                     | -4.74669600 | 0.03411100  | -5.86669000 |
| C                     | 2.52352200  | -1.00619900 | -1.46836500 | H                     | -1.68437000 | 1.64683200  | -7.42860400 |
| H                     | 2.14945200  | 1.69990600  | -1.28976600 | H                     | -1.14458700 | 0.04802900  | -6.87629300 |
| H                     | 3.52035500  | 2.07638200  | -0.23957500 | H                     | -0.70116800 | 1.48873400  | -5.95755500 |
| H                     | 3.80205400  | 1.44215300  | -1.87353100 | H                     | -1.76840300 | 0.47172600  | -3.98369200 |
| H                     | 4.46840700  | -1.49032300 | 0.42455600  | H                     | -0.83278000 | 1.10785800  | -3.09394400 |
| H                     | 5.18669100  | -0.51165300 | -0.86949000 | C                     | -1.86990800 | -1.15701900 | 1.16596400  |
| H                     | 4.91548600  | 0.19058700  | 0.73708700  | C                     | -2.07018500 | -0.17500100 | 0.18544700  |
| H                     | 3.12319100  | -1.01337800 | -2.38399600 | C                     | -3.36409200 | -0.02137400 | -0.36204100 |
| H                     | 2.49231300  | -2.02201100 | -1.06835800 | C                     | -4.39332300 | -0.84352400 | 0.07872000  |

|                        |             |             |             |                        |             |             |             |
|------------------------|-------------|-------------|-------------|------------------------|-------------|-------------|-------------|
| C                      | -4.18285500 | -1.81752300 | 1.05396800  | H                      | -1.70845500 | -0.16581800 | -4.08267900 |
| C                      | -2.91090900 | -1.96873000 | 1.59792600  | H                      | -1.80365200 | -0.34405900 | -2.31645600 |
| H                      | -0.87210200 | -1.26829400 | 1.57421500  | H                      | 0.34380900  | 1.01912300  | -5.11741200 |
| H                      | -5.38240700 | -0.71973600 | -0.35172500 | H                      | 1.40812200  | -0.09082100 | -4.22713200 |
| H                      | -5.00085600 | -2.44854000 | 1.38050200  | H                      | 1.60564300  | 1.65094200  | -4.03777700 |
| H                      | -2.72832300 | -2.72213800 | 2.35575600  | H                      | 1.51289800  | 1.41605100  | -1.59609500 |
| C                      | -3.56955900 | 1.01790300  | -1.43648000 | H                      | 2.27755700  | 2.07622000  | -1.41237600 |
| C                      | -2.54848300 | 2.14397500  | -1.29230700 |                        |             |             |             |
| C                      | -1.17439200 | 1.59184500  | -1.00933300 | <b>M1<sub>Li</sub></b> |             |             |             |
| N                      | -0.97043200 | 0.59070400  | -0.21112200 | Li                     | 0.39983200  | -0.82232200 | -0.45600300 |
| H                      | -4.58933000 | 1.41064800  | -1.39390000 | O                      | 0.39055600  | -2.17525200 | -1.37399000 |
| H                      | -2.81938800 | 2.77963100  | -0.43455600 | C                      | 0.36960400  | -3.33556200 | -2.11390200 |
| H                      | -3.44355200 | 0.55015500  | -2.41612800 | C                      | 0.17199100  | -4.54969300 | -1.18393200 |
| H                      | -2.52423300 | 2.77397500  | -2.17943900 | C                      | -0.78800100 | -3.29243900 | -3.13169500 |
| H                      | -0.32428800 | 2.22206000  | -1.23692500 | C                      | 1.70039100  | -3.50012500 | -2.87561500 |
|                        |             |             |             | H                      | 0.98314000  | -4.58790200 | -0.45214100 |
| <b>M3<sub>t</sub></b>  |             |             |             | H                      | -0.76904600 | -4.44452000 | -0.63759100 |
| O                      | 0.67372400  | -0.29736200 | 1.16083300  | H                      | 0.15099400  | -5.50002600 | -1.72689400 |
| C                      | -0.03675100 | -0.01956800 | -0.03187600 | H                      | -0.66263200 | -2.43391100 | -3.79625400 |
| C                      | -0.76701300 | 1.32882400  | 0.08179500  | H                      | -0.84579100 | -4.19793700 | -3.74401500 |
| C                      | -1.05222900 | -1.15032000 | -0.20415700 | H                      | -1.73784900 | -3.17277400 | -2.60406300 |
| C                      | 0.92647600  | 0.00577700  | -1.22925800 | H                      | 1.73263600  | -4.41332600 | -3.47834300 |
| H                      | -0.04607600 | 2.13017000  | 0.25112000  | H                      | 1.85467400  | -2.64404600 | -3.53737600 |
| H                      | -1.45363800 | 1.31018800  | 0.93195100  | H                      | 2.52956100  | -3.52828500 | -2.16389800 |
| H                      | -1.34131500 | 1.55446400  | -0.82292000 | C                      | -1.85465100 | 0.78290400  | 1.05196500  |
| H                      | -0.53774900 | -2.11213300 | -0.26767500 | C                      | -0.55415000 | 1.21649000  | 1.32650200  |
| H                      | -1.64958200 | -1.01553700 | -1.11071800 | C                      | -0.30555100 | 2.56796300  | 1.59250900  |
| H                      | -1.72785700 | -1.18593600 | 0.65397300  | C                      | -1.38028400 | 3.45894900  | 1.54620700  |
| H                      | 0.39838800  | 0.18851000  | -2.17085900 | C                      | -2.66960900 | 3.03341900  | 1.26351500  |
| H                      | 1.44906600  | -0.95111200 | -1.30415700 | C                      | -2.90804700 | 1.68247300  | 1.02474500  |
| H                      | 1.67554300  | 0.78577100  | -1.08622700 | H                      | -2.03405300 | -0.26893900 | 0.85541600  |
| H                      | 1.37686200  | 0.42899900  | 1.31502800  | H                      | -1.19396500 | 4.50671200  | 1.75467900  |
| H                      | 2.41600000  | 1.49430500  | 1.54590900  | H                      | -3.48385600 | 3.74628600  | 1.23681100  |
|                        |             |             |             | H                      | -3.90916400 | 1.33164500  | 0.80897300  |
| <b>TS3<sub>t</sub></b> |             |             |             | C                      | 1.08046500  | 3.04721800  | 1.95700700  |
| O                      | 0.59754600  | 0.57969900  | -1.78131000 | C                      | 1.94748700  | 1.90193800  | 2.47365600  |
| C                      | -0.09356700 | 0.82687100  | -2.95645700 | C                      | 1.87636200  | 0.74240500  | 1.48990000  |
| C                      | -0.84596200 | 2.17650800  | -2.88124500 | N                      | 0.49804200  | 0.23755500  | 1.30524500  |
| C                      | -1.11896100 | -0.30165600 | -3.16793800 | H                      | 1.00479400  | 3.84201300  | 2.70185000  |
| C                      | 0.86753000  | 0.85765100  | -4.16791800 | H                      | 1.59196900  | 1.57078400  | 3.45431500  |
| H                      | -0.13553900 | 2.98898100  | -2.71554200 | H                      | 2.49338200  | -0.09863600 | 1.80532100  |
| H                      | -1.53802400 | 2.16190300  | -2.03467800 | H                      | 0.29905900  | -0.48319000 | 1.99273800  |
| H                      | -1.41763900 | 2.39331500  | -3.79166600 | H                      | 1.55806400  | 3.49362400  | 1.07741800  |
| H                      | -0.60206000 | -1.26311200 | -3.22802300 | H                      | 2.98364200  | 2.22435400  | 2.59253700  |

|                         |             |             |             |                         |             |             |             |
|-------------------------|-------------|-------------|-------------|-------------------------|-------------|-------------|-------------|
| H                       | 2.25285200  | 1.07555100  | 0.51784900  | C                       | -1.10455300 | -2.40950200 | -1.66868900 |
|                         |             |             |             | C                       | 0.93015600  | -3.62927500 | -2.51377400 |
| <b>TS1<sub>Li</sub></b> |             |             |             | H                       | 1.53609700  | -3.69940100 | 0.17163100  |
| Li                      | 1.33782600  | 0.44515900  | -2.06407500 | H                       | 0.09909400  | -2.84678600 | 0.76156700  |
| O                       | 0.90425100  | -1.22659100 | -1.59200900 | H                       | -0.07168900 | -4.41648200 | -0.02949500 |
| C                       | 0.35949800  | -2.53302500 | -1.47286500 | H                       | -1.19183800 | -1.89381800 | -2.62746700 |
| C                       | 0.83160400  | -3.14754900 | -0.15186300 | H                       | -1.73251200 | -3.30191700 | -1.70544000 |
| C                       | -1.16957000 | -2.44550400 | -1.50316300 | H                       | -1.49278800 | -1.75020500 | -0.89018900 |
| C                       | 0.87259000  | -3.35100000 | -2.65675300 | H                       | 0.37764900  | -4.56510800 | -2.61216500 |
| H                       | 1.92262100  | -3.17460200 | -0.11788300 | H                       | 0.87149000  | -3.09760800 | -3.46600200 |
| H                       | 0.47823800  | -2.55105700 | 0.69215100  | H                       | 1.97706400  | -3.86483500 | -2.31528900 |
| H                       | 0.45560100  | -4.16565200 | -0.02857100 | C                       | -1.26296900 | 1.28798300  | -0.67666800 |
| H                       | -1.50285800 | -1.99545100 | -2.44083800 | C                       | -0.15171300 | 1.33365600  | 0.20532000  |
| H                       | -1.62827400 | -3.43336900 | -1.41542100 | C                       | -0.41342900 | 1.79124700  | 1.53085600  |
| H                       | -1.53297600 | -1.82486200 | -0.68191900 | C                       | -1.70164500 | 2.16652000  | 1.89412500  |
| H                       | 0.49106700  | -4.37423000 | -2.62892000 | C                       | -2.77500600 | 2.11895700  | 1.00771200  |
| H                       | 0.55705500  | -2.89386300 | -3.59751200 | C                       | -2.53577200 | 1.66932900  | -0.29009200 |
| H                       | 1.96397000  | -3.38945000 | -2.64490600 | H                       | -1.10080400 | 0.94804300  | -1.69614900 |
| C                       | -1.38626700 | 1.33485300  | -0.66501900 | H                       | -1.87008400 | 2.50117800  | 2.91388400  |
| C                       | -0.29693600 | 1.36083500  | 0.23537100  | H                       | -3.76589600 | 2.42313300  | 1.31947300  |
| C                       | -0.50053600 | 2.00253900  | 1.48352100  | H                       | -3.34771800 | 1.61915300  | -1.00745100 |
| C                       | -1.72652000 | 2.60209000  | 1.75745000  | C                       | 0.71518600  | 1.83735900  | 2.53740700  |
| C                       | -2.77958000 | 2.59004500  | 0.84898200  | C                       | 1.84288600  | 0.88959200  | 2.13460200  |
| C                       | -2.59693000 | 1.93796500  | -0.36904600 | C                       | 2.19445900  | 1.13369200  | 0.66716800  |
| H                       | -1.26867500 | 0.81487700  | -1.61042000 | N                       | 1.07321000  | 0.91285700  | -0.24002000 |
| H                       | -1.85983400 | 3.08350300  | 2.72158000  | H                       | 0.33742200  | 1.59093900  | 3.53377900  |
| H                       | -3.72144700 | 3.06662500  | 1.08883800  | H                       | 1.51867300  | -0.14968300 | 2.25621500  |
| H                       | -3.40409500 | 1.89607800  | -1.09156400 | H                       | 3.01980900  | 0.47598600  | 0.36981400  |
| C                       | 0.60422700  | 1.99271100  | 2.51493500  | H                       | 0.93614300  | -1.01133400 | -0.57137300 |
| C                       | 1.54963300  | 0.81761700  | 2.27609400  | H                       | 1.11560100  | 2.85607200  | 2.60593600  |
| C                       | 1.99971800  | 0.83382300  | 0.81753400  | H                       | 2.72025900  | 1.03603600  | 2.77048300  |
| N                       | 0.88977300  | 0.75055100  | -0.13175400 | H                       | 2.57985100  | 2.16388500  | 0.57784900  |
| H                       | 0.17378400  | 1.94855500  | 3.51873400  |                         |             |             |             |
| H                       | 1.03113300  | -0.12365800 | 2.48349700  | <b>TS2<sub>Li</sub></b> |             |             |             |
| H                       | 2.67564700  | -0.00477000 | 0.62114800  | Li                      | -3.60302700 | -3.76920000 | 1.70957800  |
| H                       | 0.76180700  | -0.50420600 | -0.71280900 | O                       | -4.50129100 | -5.37346900 | 1.21333800  |
| H                       | 1.17601100  | 2.92734500  | 2.46593900  | C                       | -4.18123700 | -6.74321400 | 0.85334700  |
| H                       | 2.41499400  | 0.87060200  | 2.94140900  | C                       | -3.30680100 | -7.35161200 | 1.94778000  |
| H                       | 2.58472200  | 1.75235100  | 0.65287400  | C                       | -5.48768200 | -7.51538800 | 0.69572000  |
| <b>M2<sub>Li</sub></b>  |             |             |             | C                       | -3.42898300 | -6.64895500 | -0.46634700 |
| Li                      | 1.38846000  | 0.20050500  | -1.97031500 | H                       | -2.38837800 | -6.77450600 | 2.06952600  |
| O                       | 1.14982900  | -1.57173900 | -1.36068400 | H                       | -3.83745500 | -7.36496600 | 2.90303900  |
| C                       | 0.35022200  | -2.78161000 | -1.39024100 | H                       | -3.03609300 | -8.37972800 | 1.69993300  |
| C                       | 0.48823800  | -3.47960100 | -0.03982700 | H                       | -6.11879400 | -7.04552400 | -0.06019300 |

|                        |             |             |             |                         |             |             |             |
|------------------------|-------------|-------------|-------------|-------------------------|-------------|-------------|-------------|
| H                      | -5.29451200 | -8.54674200 | 0.39512200  | H                       | 0.63191400  | 2.52221000  | 0.21272700  |
| H                      | -6.03907300 | -7.53711600 | 1.63898200  | C                       | 0.79980700  | -1.66706000 | 0.87750200  |
| H                      | -3.16011100 | -7.64385600 | -0.82429000 | C                       | 0.58502000  | -0.27330000 | 1.16449200  |
| H                      | -4.04567900 | -6.16443100 | -1.22529700 | C                       | -0.66158100 | 0.03734400  | 1.83109600  |
| H                      | -2.51081800 | -6.07069800 | -0.34488600 | C                       | -1.61722700 | -0.95017100 | 2.02638000  |
| C                      | -6.95016600 | -2.90794000 | 3.05389300  | C                       | -1.42432600 | -2.28322100 | 1.62773900  |
| C                      | -5.64971000 | -2.70465500 | 3.52578000  | C                       | -0.17183200 | -2.62828100 | 1.09195500  |
| C                      | -5.27686700 | -1.43292100 | 4.00260400  | H                       | 1.74497200  | -1.93526600 | 0.42125600  |
| C                      | -6.21662400 | -0.40864000 | 3.99323300  | H                       | -2.55882200 | -0.67063000 | 2.48994500  |
| C                      | -7.51092800 | -0.61677600 | 3.52433100  | H                       | -2.18792800 | -3.02983900 | 1.79531900  |
| C                      | -7.87636600 | -1.87368100 | 3.05390300  | H                       | 0.03210500  | -3.65824300 | 0.82181200  |
| H                      | -7.22145600 | -3.89291500 | 2.69301500  | C                       | -0.90177400 | 1.46879900  | 2.25115200  |
| H                      | -5.92913800 | 0.56991900  | 4.36252200  | C                       | 0.42592900  | 2.22043300  | 2.32693800  |
| H                      | -8.22726000 | 0.19524100  | 3.52894900  | C                       | 1.19438000  | 2.02187500  | 1.01995900  |
| H                      | -8.88084000 | -2.04903700 | 2.68882900  | N                       | 1.44108400  | 0.62505000  | 0.67864500  |
| C                      | -3.85916400 | -1.21679500 | 4.47910700  | H                       | -1.42579000 | 1.49210700  | 3.21089000  |
| C                      | -3.24444300 | -2.52658400 | 4.96446500  | H                       | 1.02291900  | 1.82935700  | 3.15699100  |
| C                      | -3.58083900 | -3.65922500 | 4.03996700  | H                       | -1.55527600 | 1.97215700  | 1.52867300  |
| N                      | -4.75469900 | -3.79448600 | 3.47737700  | H                       | 0.25944100  | 3.28378500  | 2.51671300  |
| H                      | -3.83792300 | -0.46560500 | 5.27114500  | H                       | 2.15868900  | 2.53770500  | 1.07167100  |
| H                      | -3.66536700 | -2.79612900 | 5.94372500  |                         |             |             |             |
| H                      | -2.96422500 | -4.54850100 | 4.09599600  | <b>TS3<sub>Li</sub></b> |             |             |             |
| H                      | -4.93713700 | -5.32552000 | 2.08812300  | Li                      | -2.72116200 | -0.55834800 | -1.55461100 |
| H                      | -3.25588400 | -0.82932100 | 3.65356800  | O                       | -2.15782900 | 0.73983600  | -2.63028100 |
| H                      | -2.16563700 | -2.44592300 | 5.08267000  | C                       | -2.23787800 | 1.05951800  | -4.01119300 |
| H                      | -2.25613900 | -3.13254300 | 2.51534100  | C                       | -2.86819000 | 2.44826100  | -4.17333000 |
|                        |             |             |             | C                       | -3.11551700 | 0.00574400  | -4.69214500 |
| <b>M3<sub>Li</sub></b> |             |             |             | C                       | -0.83035300 | 1.04135200  | -4.61951600 |
| Li                     | -1.07440700 | -1.01778000 | -0.30034800 | H                       | -2.25708100 | 3.20182000  | -3.67324400 |
| O                      | -0.18837600 | 0.11155700  | -1.51201500 | H                       | -3.86285400 | 2.46438800  | -3.72223000 |
| C                      | 0.05817100  | 0.40666600  | -2.90512000 | H                       | -2.96133200 | 2.72616000  | -5.22618400 |
| C                      | 0.30524100  | 1.90730200  | -3.04603200 | H                       | -2.67919700 | -0.99011100 | -4.57481300 |
| C                      | -1.19969300 | -0.01508500 | -3.65307200 | H                       | -3.21610900 | 0.20219100  | -5.76236800 |
| C                      | 1.27339500  | -0.39663700 | -3.36518700 | H                       | -4.11841800 | 0.00216200  | -4.25637300 |
| H                      | 1.18223200  | 2.20727300  | -2.46878500 | H                       | -0.85299700 | 1.26846900  | -5.68842500 |
| H                      | -0.55504800 | 2.47107000  | -2.68112600 | H                       | -0.37441200 | 0.05828500  | -4.48367200 |
| H                      | 0.47858500  | 2.17597500  | -4.08984700 | H                       | -0.19506200 | 1.77782500  | -4.12449500 |
| H                      | -1.38182100 | -1.08565000 | -3.53204100 | H                       | -1.44215700 | 1.61047900  | -2.01106100 |
| H                      | -1.10043000 | 0.19057300  | -4.71995700 | H                       | -0.89961700 | 2.20470700  | -1.45074900 |
| H                      | -2.06884000 | 0.53032900  | -3.27962100 | C                       | -1.63662900 | -1.51449900 | 0.41641300  |
| H                      | 1.48946500  | -0.20802000 | -4.41865500 | C                       | -1.63266000 | -0.10260000 | 0.46851700  |
| H                      | 1.09481300  | -1.46547300 | -3.23371200 | C                       | -2.88743900 | 0.56596400  | 0.52232000  |
| H                      | 2.15439800  | -0.12444300 | -2.78036700 | C                       | -4.06315500 | -0.18010600 | 0.47064900  |
| H                      | 0.58954800  | 0.38381700  | -0.94272200 | C                       | -4.05037600 | -1.57367500 | 0.37855500  |

|                        |             |             |             |                         |             |             |             |
|------------------------|-------------|-------------|-------------|-------------------------|-------------|-------------|-------------|
| C                      | -2.82147800 | -2.23829400 | 0.36689200  | C                       | 2.91067600  | 1.58827100  | -1.62701200 |
| H                      | -0.67821900 | -2.01626700 | 0.37170100  | C                       | 1.45772500  | 1.38061700  | -1.92428900 |
| H                      | -5.01279600 | 0.34428800  | 0.48328100  | H                       | 4.28141800  | 1.23706300  | 0.01726600  |
| H                      | -4.97849800 | -2.12688400 | 0.32530400  | H                       | 3.47652000  | 0.90644500  | -2.27651500 |
| H                      | -2.78836300 | -3.31881500 | 0.30311200  | H                       | 2.82845300  | 2.11685600  | 0.45990900  |
| C                      | -2.93462300 | 2.07782700  | 0.54204600  | H                       | 3.20698100  | 2.60047800  | -1.90416300 |
| C                      | -1.55598400 | 2.68535200  | 0.79562400  | H                       | 0.98853300  | 1.98040500  | -2.70097600 |
| C                      | -0.45831500 | 1.84674400  | 0.18396300  | N                       | 0.72390800  | 0.51250200  | -1.33689900 |
| N                      | -0.42047800 | 0.54144400  | 0.31518900  |                         |             |             |             |
| H                      | -3.64424800 | 2.41296600  | 1.30223300  | <b>TS4<sub>Li</sub></b> |             |             |             |
| H                      | -1.35031500 | 2.71105400  | 1.87325900  | O                       | -1.81630200 | 0.50446300  | -0.51289800 |
| H                      | -3.31693300 | 2.42634600  | -0.42017600 | C                       | -2.84154200 | 0.31697800  | 0.44880400  |
| H                      | -1.50527200 | 3.71153200  | 0.43215000  | C                       | -3.14739800 | 1.65088200  | 1.14295100  |
| H                      | 0.50058000  | 2.33748300  | 0.04240300  | C                       | -4.09645000 | -0.21345600 | -0.25405100 |
|                        |             |             |             | H                       | -3.47708500 | 2.39209700  | 0.41247400  |
| <b>M4<sub>Li</sub></b> |             |             |             | H                       | -2.25006200 | 2.03438000  | 1.63421100  |
| O                      | -2.72237600 | -0.21484800 | -0.81612400 | H                       | -3.93138300 | 1.54133800  | 1.89668800  |
| C                      | -3.44543000 | 0.08366500  | 0.40268200  | H                       | -4.90660700 | -0.39845100 | 0.45610200  |
| C                      | -3.38528700 | 1.58800600  | 0.66952200  | H                       | -3.86993900 | -1.14740600 | -0.77254700 |
| C                      | -4.88894100 | -0.38672000 | 0.23798000  | H                       | -4.44935800 | 0.50702800  | -0.99500300 |
| H                      | -3.83943000 | 2.14450000  | -0.15259400 | H                       | -2.03249900 | 1.32776700  | -1.33546500 |
| H                      | -2.34932500 | 1.91759700  | 0.77329700  | H                       | -1.76832900 | 2.06909200  | -2.10059400 |
| H                      | -3.91747100 | 1.84105000  | 1.58898800  | C                       | -2.33569300 | -0.70381400 | 1.46978800  |
| H                      | -5.46251300 | -0.21041000 | 1.15036200  | H                       | -3.09081900 | -0.91073900 | 2.23243200  |
| H                      | -4.91639400 | -1.45393400 | 0.01178100  | H                       | -2.08415700 | -1.64315300 | 0.97264600  |
| H                      | -5.37864800 | 0.14917500  | -0.57849100 | H                       | -1.44021300 | -0.32879800 | 1.96966000  |
| H                      | -3.12480100 | 0.24992400  | -1.59040700 | Li                      | -0.33110000 | 1.27083100  | -1.22408600 |
| H                      | -2.35169800 | 1.05017500  | -3.01498500 | C                       | 1.42923500  | -0.64830500 | 0.51560800  |
| C                      | -2.73753300 | -0.69415800 | 1.50415300  | C                       | 2.25308300  | 0.24537200  | -0.16683700 |
| H                      | -3.22905100 | -0.52750800 | 2.46441700  | C                       | 3.61972300  | 0.33015100  | 0.13911700  |
| H                      | -2.75528400 | -1.76421400 | 1.29049000  | C                       | 4.13308900  | -0.49220400 | 1.13422900  |
| H                      | -1.69695900 | -0.37847900 | 1.59225800  | C                       | 3.31340700  | -1.38989100 | 1.81338200  |
| Li                     | -1.22089100 | 0.44370200  | -1.84220000 | C                       | 1.96034400  | -1.46854200 | 1.50222300  |
| C                      | 0.62047400  | -1.46739200 | 0.04126100  | H                       | 0.37531700  | -0.69483800 | 0.26906400  |
| C                      | 1.30667800  | -0.31600000 | -0.34045900 | H                       | 5.18748400  | -0.43164500 | 1.37867800  |
| C                      | 2.52884200  | 0.01498100  | 0.26527300  | H                       | 3.73249500  | -2.02584100 | 2.58297200  |
| C                      | 3.03647800  | -0.82406200 | 1.24975200  | H                       | 1.31691200  | -2.16297000 | 2.02707900  |
| C                      | 2.35358200  | -1.97710000 | 1.62778100  | C                       | 4.45198800  | 1.34474900  | -0.60023400 |
| C                      | 1.14509800  | -2.29985700 | 1.02095200  | C                       | 3.91455300  | 1.53670800  | -2.01825700 |
| H                      | -0.32545600 | -1.70298000 | -0.42965000 | C                       | 2.42239900  | 1.66384300  | -2.00393300 |
| H                      | 3.97836400  | -0.57433900 | 1.72474200  | H                       | 5.49956600  | 1.04334500  | -0.62284600 |
| H                      | 2.76596300  | -2.62106100 | 2.39427500  | H                       | 4.16072100  | 0.66584500  | -2.64120500 |
| H                      | 0.60843500  | -3.19389100 | 1.31112600  | H                       | 4.40807200  | 2.30055000  | -0.06478300 |
| C                      | 3.20652100  | 1.29280000  | -0.15677100 | H                       | 4.35925200  | 2.40463800  | -2.50583200 |

|                          |             |             |             |   |             |             |             |
|--------------------------|-------------|-------------|-------------|---|-------------|-------------|-------------|
| H                        | 1.94045900  | 2.27141400  | -2.76686100 | C | -0.24053100 | 0.40307000  | -3.24140400 |
| N                        | 1.66279600  | 1.07438900  | -1.16005600 | C | -0.27888900 | 1.93251400  | -3.04212100 |
|                          |             |             |             | C | -1.56305700 | -0.05067000 | -3.89098700 |
| <b>M4a<sub>Li</sub></b>  |             |             |             | C | 0.92747300  | 0.05204800  | -4.18501600 |
| O                        | 0.21377500  | 0.35277600  | -1.14941700 | H | 0.65097500  | 2.26707700  | -2.57570700 |
| C                        | -0.45216900 | 0.09276000  | 0.13578800  | H | -1.10379900 | 2.19557100  | -2.37455100 |
| C                        | -0.77975900 | 1.43431000  | 0.78025200  | H | -0.40835700 | 2.47805000  | -3.98219400 |
| C                        | -1.70770000 | -0.72628000 | -0.13686900 | H | -1.54819400 | -1.13387100 | -4.03675300 |
| H                        | -1.46636200 | 2.01021900  | 0.15460200  | H | -1.74375200 | 0.42466500  | -4.86046300 |
| H                        | 0.12799700  | 2.02111100  | 0.92685900  | H | -2.39980600 | 0.18764300  | -3.22894600 |
| H                        | -1.25697800 | 1.28670100  | 1.75038200  | H | 0.83476000  | 0.52924100  | -5.16576200 |
| H                        | -2.22196400 | -0.95775800 | 0.79726700  | H | 0.96962600  | -1.03022300 | -4.33067500 |
| H                        | -1.45566400 | -1.66374300 | -0.63442100 | H | 1.87273400  | 0.36771700  | -3.73697400 |
| H                        | -2.40437900 | -0.17388500 | -0.77285800 | H | 2.14039900  | 0.58913800  | -1.12869100 |
| H                        | -0.39454700 | 0.83580100  | -1.72359800 | H | 2.70436900  | 0.72762700  | -0.65580900 |
| H                        | 3.53534100  | -0.17022300 | -2.21903400 | C | 1.04733000  | -1.63164600 | 1.71832900  |
| C                        | 0.55901400  | -0.69197600 | 0.95753400  | C | 0.75101500  | -0.27426000 | 1.87558100  |
| H                        | 0.13656900  | -0.93863700 | 1.93185700  | C | -0.57259000 | 0.17909300  | 1.71225000  |
| H                        | 0.82572600  | -1.62682800 | 0.46041000  | C | -1.56968600 | -0.74364500 | 1.40483700  |
| H                        | 1.46713800  | -0.10876800 | 1.12575000  | C | -1.27385700 | -2.10028200 | 1.26206500  |
| Li                       | 1.98752700  | 0.02267100  | -1.67072500 | C | 0.03902700  | -2.54442100 | 1.41861800  |
|                          |             |             |             | H | 2.07517800  | -1.95104800 | 1.83090900  |
| <b>TS4a<sub>Li</sub></b> |             |             |             | H | -2.58635600 | -0.39711600 | 1.26322600  |
| O                        | -1.74309100 | 0.58070700  | -0.45517200 | H | -2.06138300 | -2.80140800 | 1.01921700  |
| C                        | -2.78644900 | 0.53266700  | 0.50802400  | H | 0.27743400  | -3.59330800 | 1.30013100  |
| C                        | -3.12851400 | 1.95982700  | 0.94755700  | C | -0.82684700 | 1.65853600  | 1.81774200  |
| C                        | -4.01320000 | -0.14234400 | -0.11396700 | C | 0.15180700  | 2.29587300  | 2.80400000  |
| H                        | -3.47661300 | 2.54710400  | 0.09538400  | C | 1.54316200  | 1.77295200  | 2.57935900  |
| H                        | -2.24385200 | 2.45000200  | 1.35888900  | N | 1.82035900  | 0.60304900  | 2.15628600  |
| H                        | -3.91205800 | 1.96323700  | 1.70908300  | H | -1.85950700 | 1.85255300  | 2.10854100  |
| H                        | -4.83495600 | -0.21217700 | 0.60257600  | H | -0.13014800 | 2.05591600  | 3.83798100  |
| H                        | -3.75909500 | -1.15052000 | -0.44760000 | H | -0.68601700 | 2.10253600  | 0.82565800  |
| H                        | -4.36083700 | 0.42453300  | -0.97992500 | H | 0.14360000  | 3.38336100  | 2.72434900  |
| H                        | -1.97093400 | 1.16050500  | -1.45858900 | H | 2.38345700  | 2.42549900  | 2.81051700  |
| H                        | -1.69624500 | 1.50771000  | -2.47391800 |   |             |             |             |
| C                        | -2.27433200 | -0.28296700 | 1.69514300  |   |             |             |             |
| H                        | -3.02959500 | -0.35470100 | 2.48153900  |   |             |             |             |
| H                        | -2.01424500 | -1.29472300 | 1.37616800  |   |             |             |             |
| H                        | -1.38166700 | 0.18266100  | 2.11839700  |   |             |             |             |
| Li                       | -0.44328300 | 0.50492700  | -1.63275300 |   |             |             |             |
|                          |             |             |             |   |             |             |             |
| <b>M5<sub>Li</sub></b>   |             |             |             |   |             |             |             |
| Li                       | 0.02260000  | -0.94827700 | -0.56451400 |   |             |             |             |
| O                        | -0.07164900 | -0.22343600 | -2.02738400 |   |             |             |             |
